# Supplementary material for: Synthesis, relaxation properties and in vivo assessment of a carborane-GdDOTA-monoamide conjugate as an MRI blood pool contrast agent
Source: Royal Society of Chemistry journal article supplement (doi:10.1039/c5ob00876j), 2015-01-01
Supplement: c5ob00876j1.pdf [file c5ob00876j1.pdf]

## Synthesis, Relaxation Properties and *In vivo* Assessment of Carborane-GdDOTA-Monoamide Conjugate as MRI Blood Pool Contrast Agent

Lalit N. Goswami, Quanyu Cai, Lixin Ma, Satish S. Jalisatgi and M. Frederick Hawthorne\*  
International Institute of Nano and Molecular Medicine,  
School of Medicine, University of Missouri, Columbia, MO 65211-3450, USA

\*Author to whom correspondence should be addressed. E-Mail: hawthornem@missouri.edu;  
Tel.: +1-573-882-7016; Fax: +1-573-884-6900.

### Contents:

1. Copies of NMR, and HRMS spectrums of compounds **1, 2, 3, 4, CB-GdDOTA-MA & CB-DyDOTA-MA.**
2. Fig. S1: IR spectrums of **4 & CB-GdDOTA-MA.**
3. Fig. S2: HPLC trace of **CB-GdDOTA-MA.**
4. Fig. S3: Determination of Hydration number (q) for **CB-DyDOTA-MA.**
5. Fig. S4: Representative *in vivo* T1-weighted MRA scans of a mouse at various time points p.i. of Omniscan.

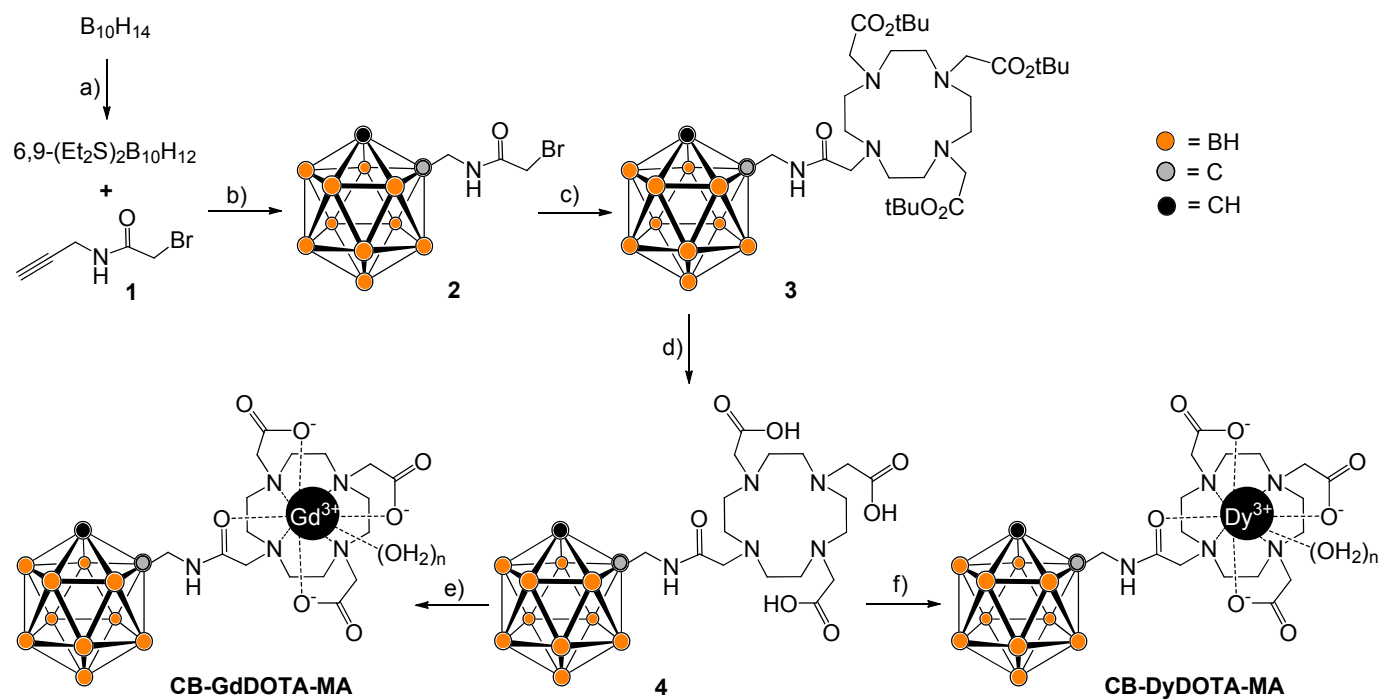

**Scheme 1** Synthesis of **CB-GdDOTA-MA**. Reagents and conditions: a)  $Et_2S$ , Toluene, 85 °C, 2 h. b) Acetonitrile, 65 °C, 12 h, 41%. c) DO3A-*t*-Bu-ester, *N,N*-diisopropylethylamine, 85 °C for 12 h, 60%. d) Formic acid, 60 °C, 12 h, 82%. e)  $GdCl_3 \cdot 6H_2O$ ,  $H_2O$ -MeOH (1:1), pH 6.5, RT, 12 h, 73%. f)  $DyCl_3 \cdot 6H_2O$ ,  $H_2O$ -MeOH (1:1), pH 6.5, RT, 12 h, 68%.

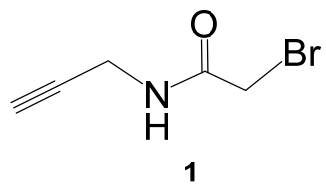

<sup>1</sup>H NMR, CDCl<sub>3</sub>, 500 MHz

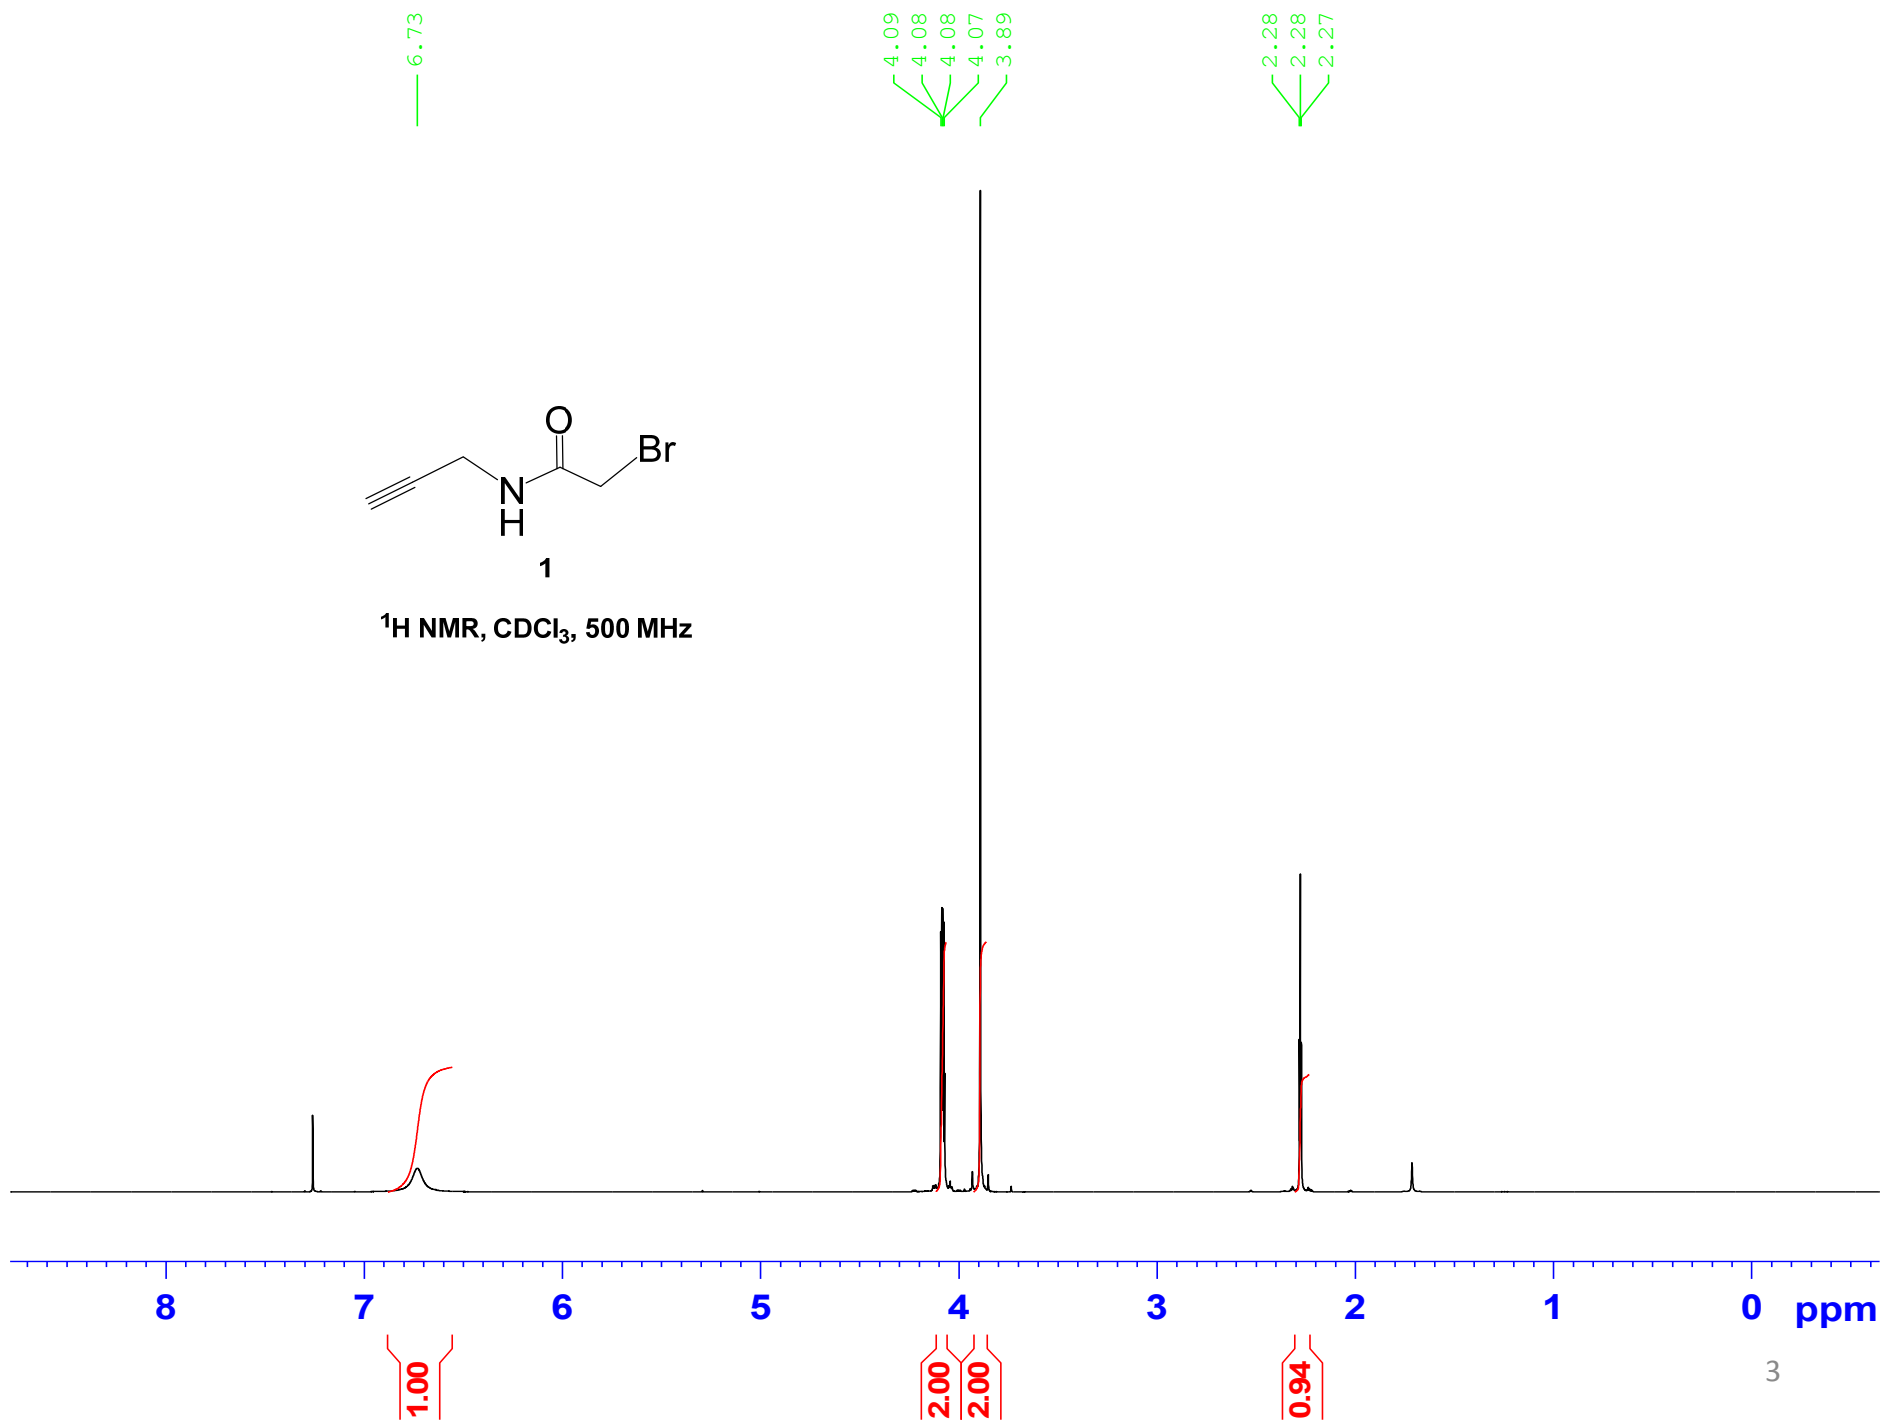

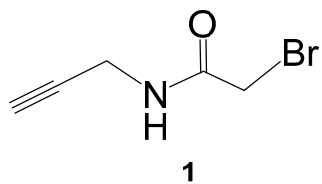

<sup>13</sup>C NMR, CDCl<sub>3</sub>, 500 MHz

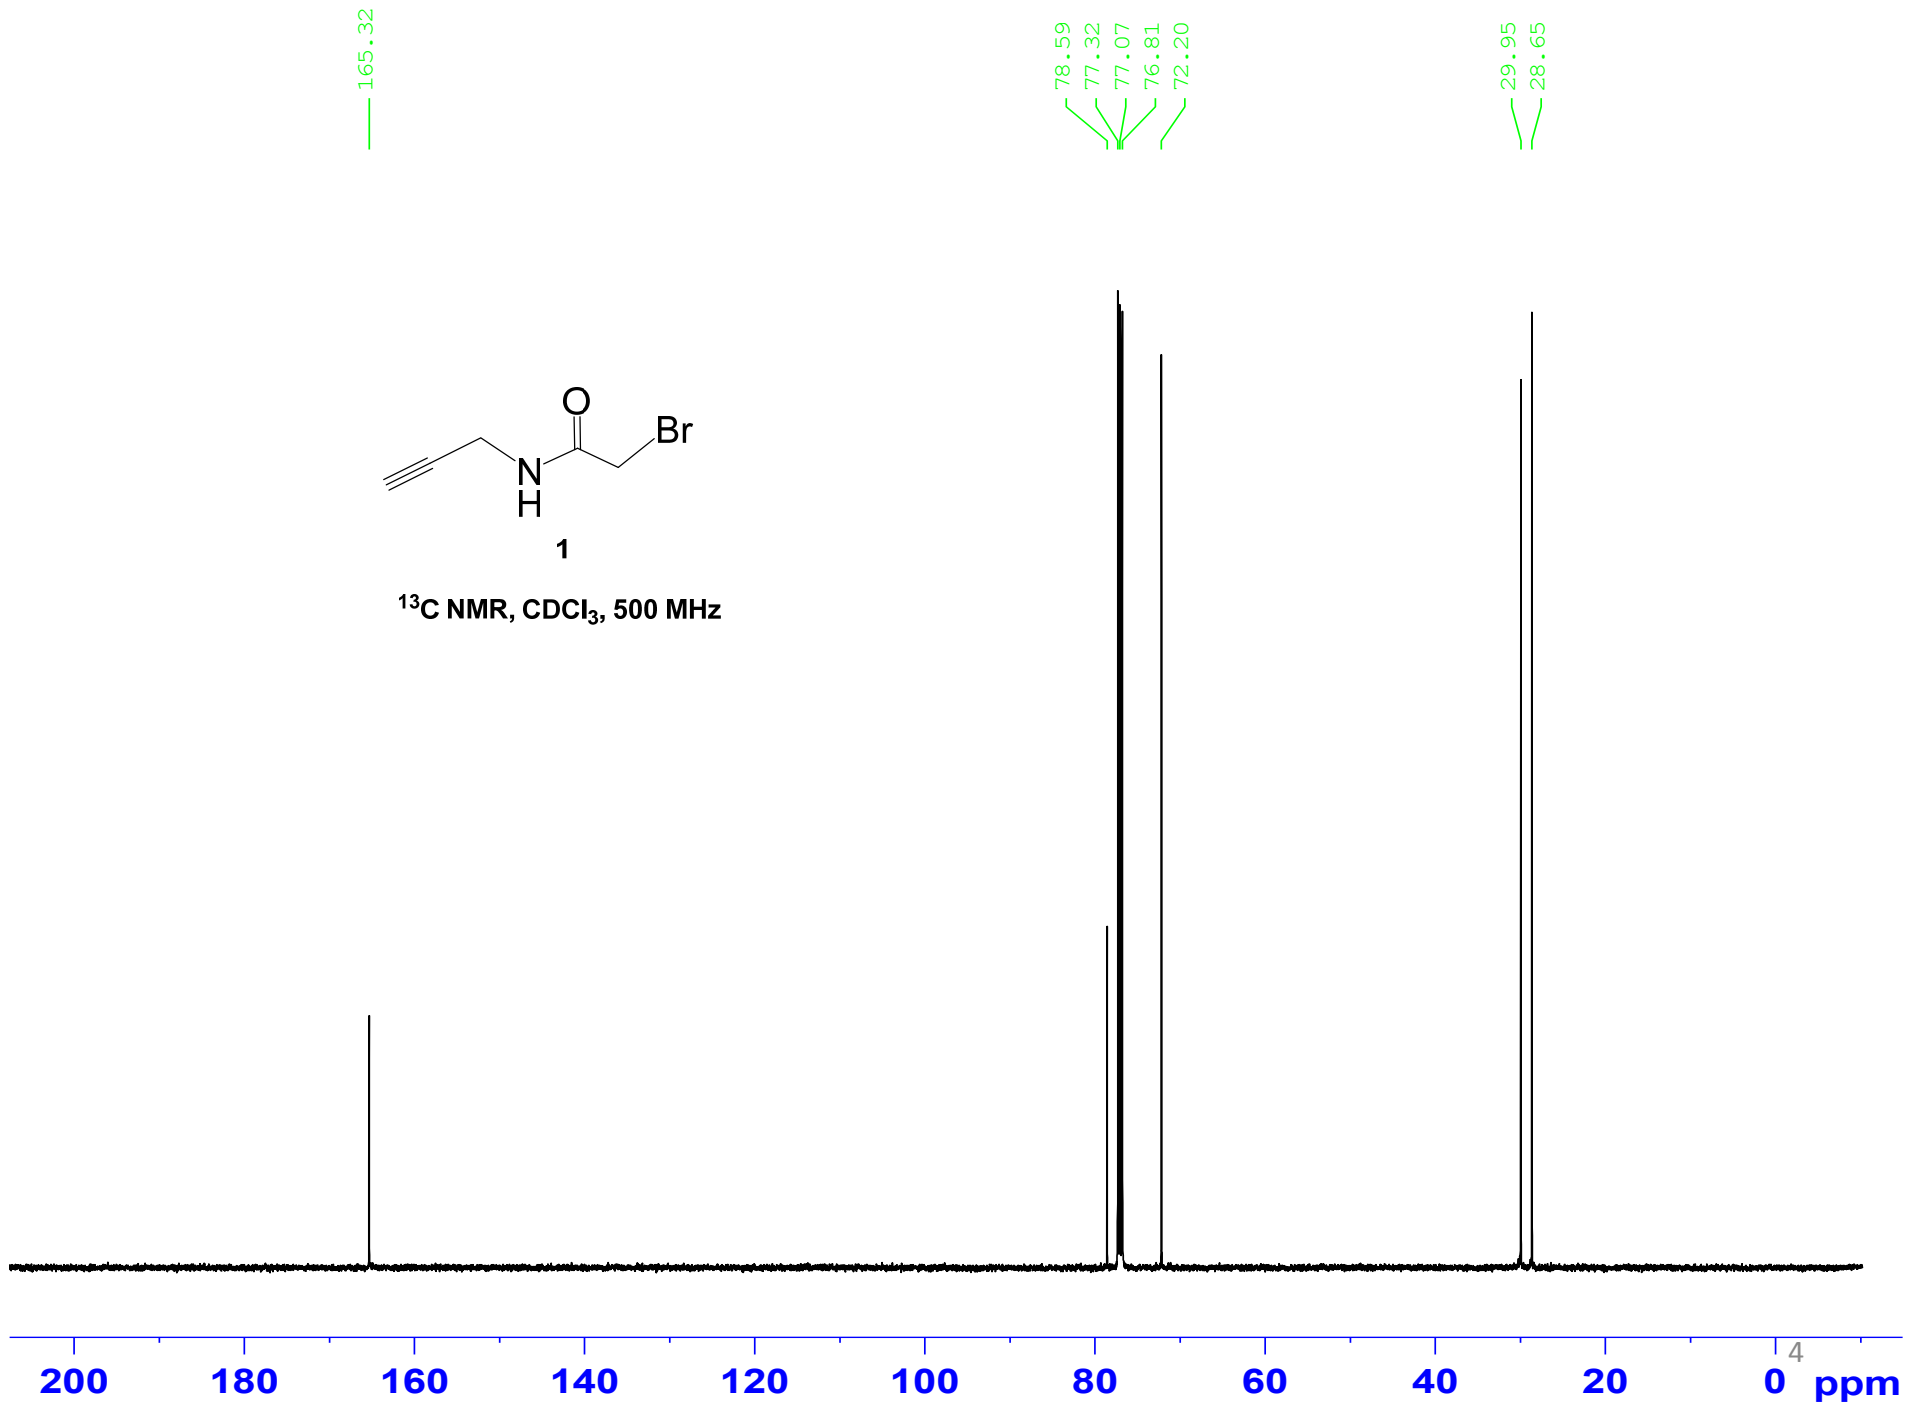

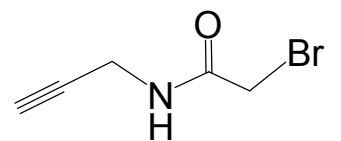

1 HRMS

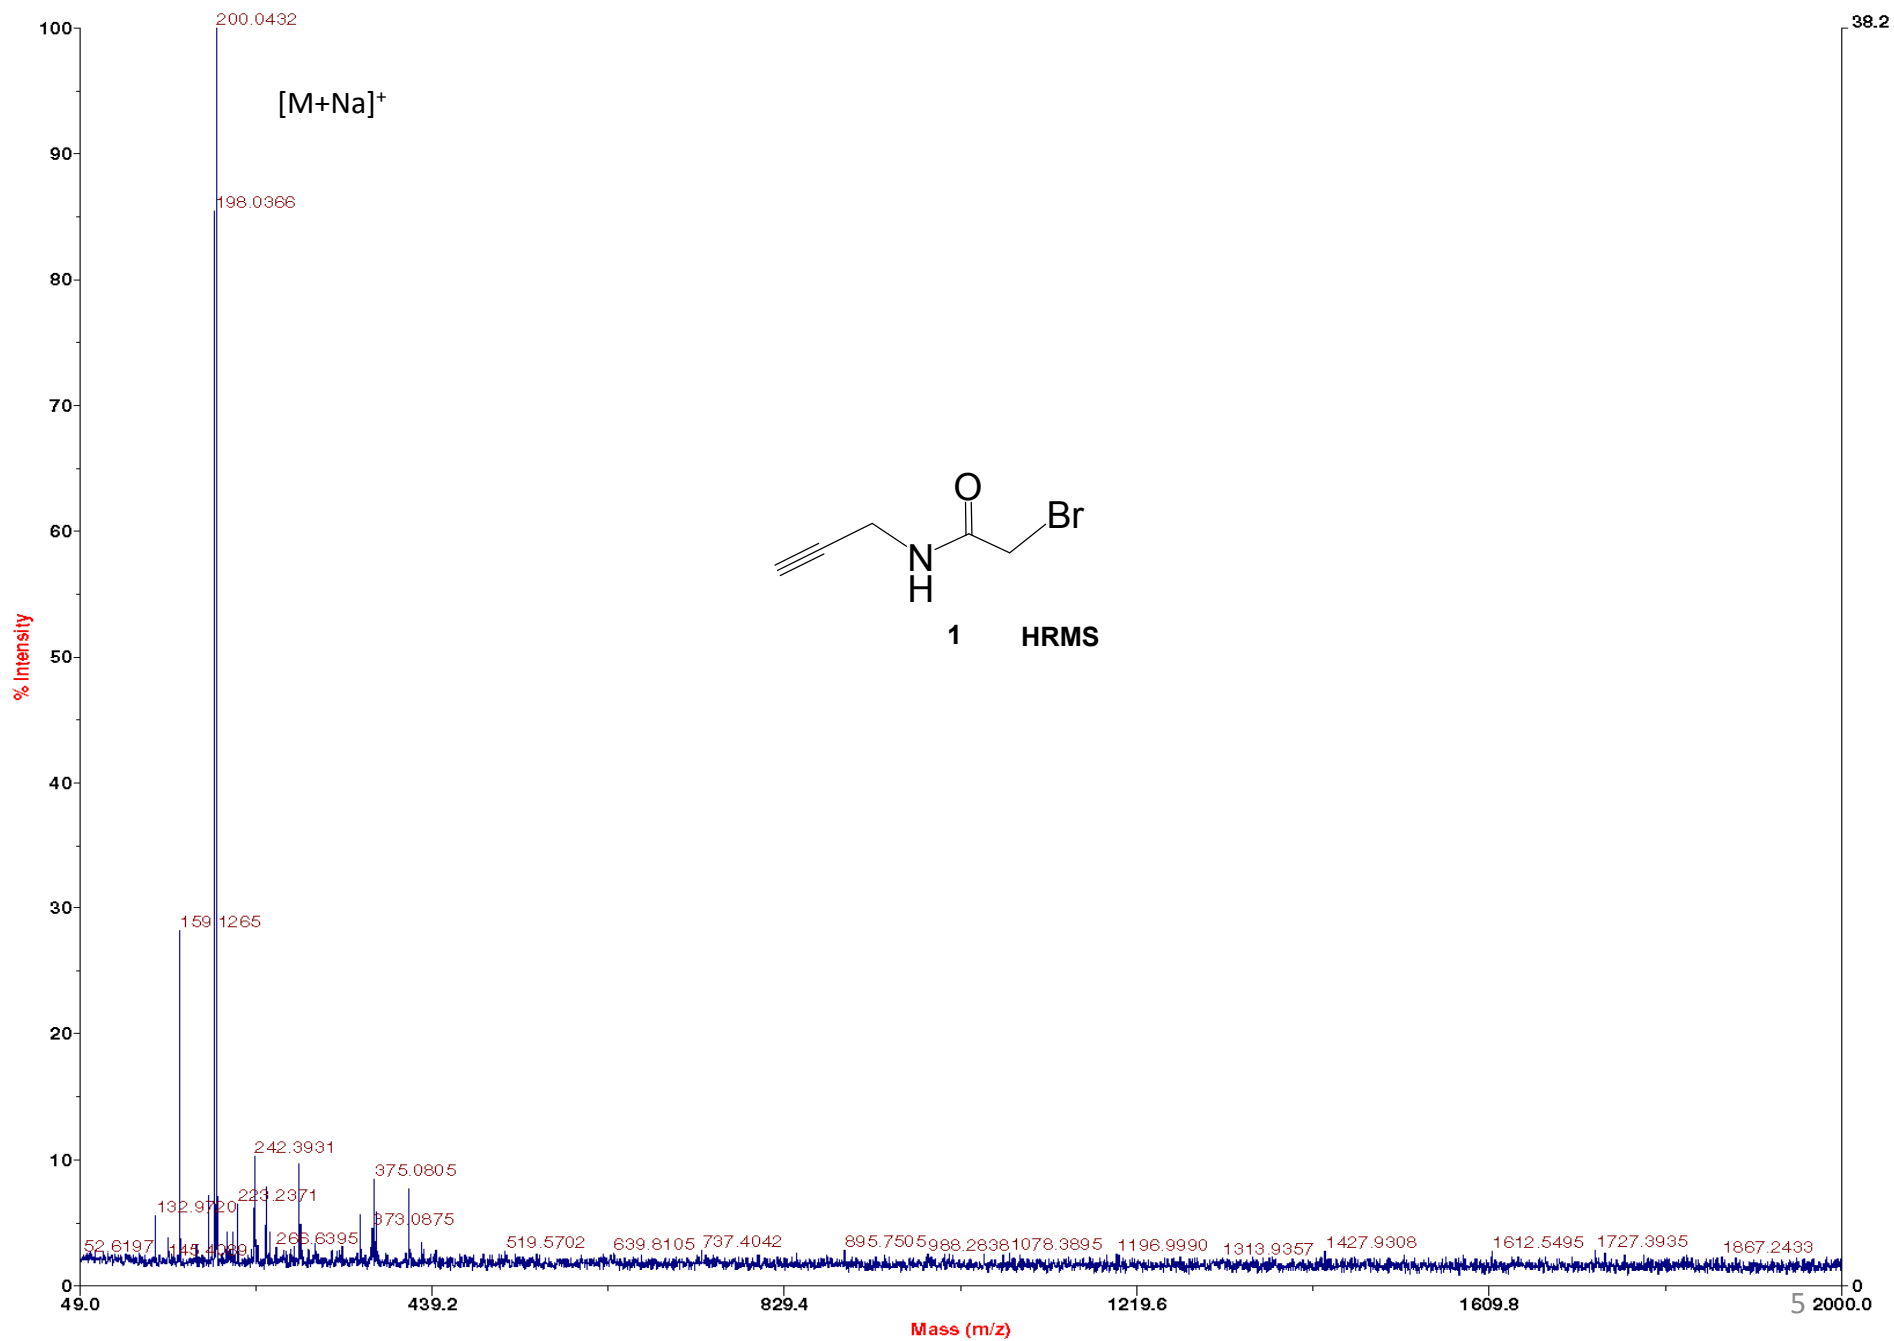

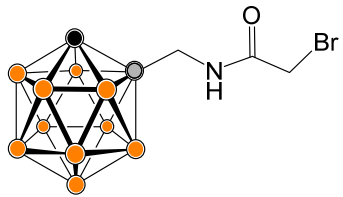

2 <sup>1</sup>H NMR, CDCl<sub>3</sub>, 500 MHz

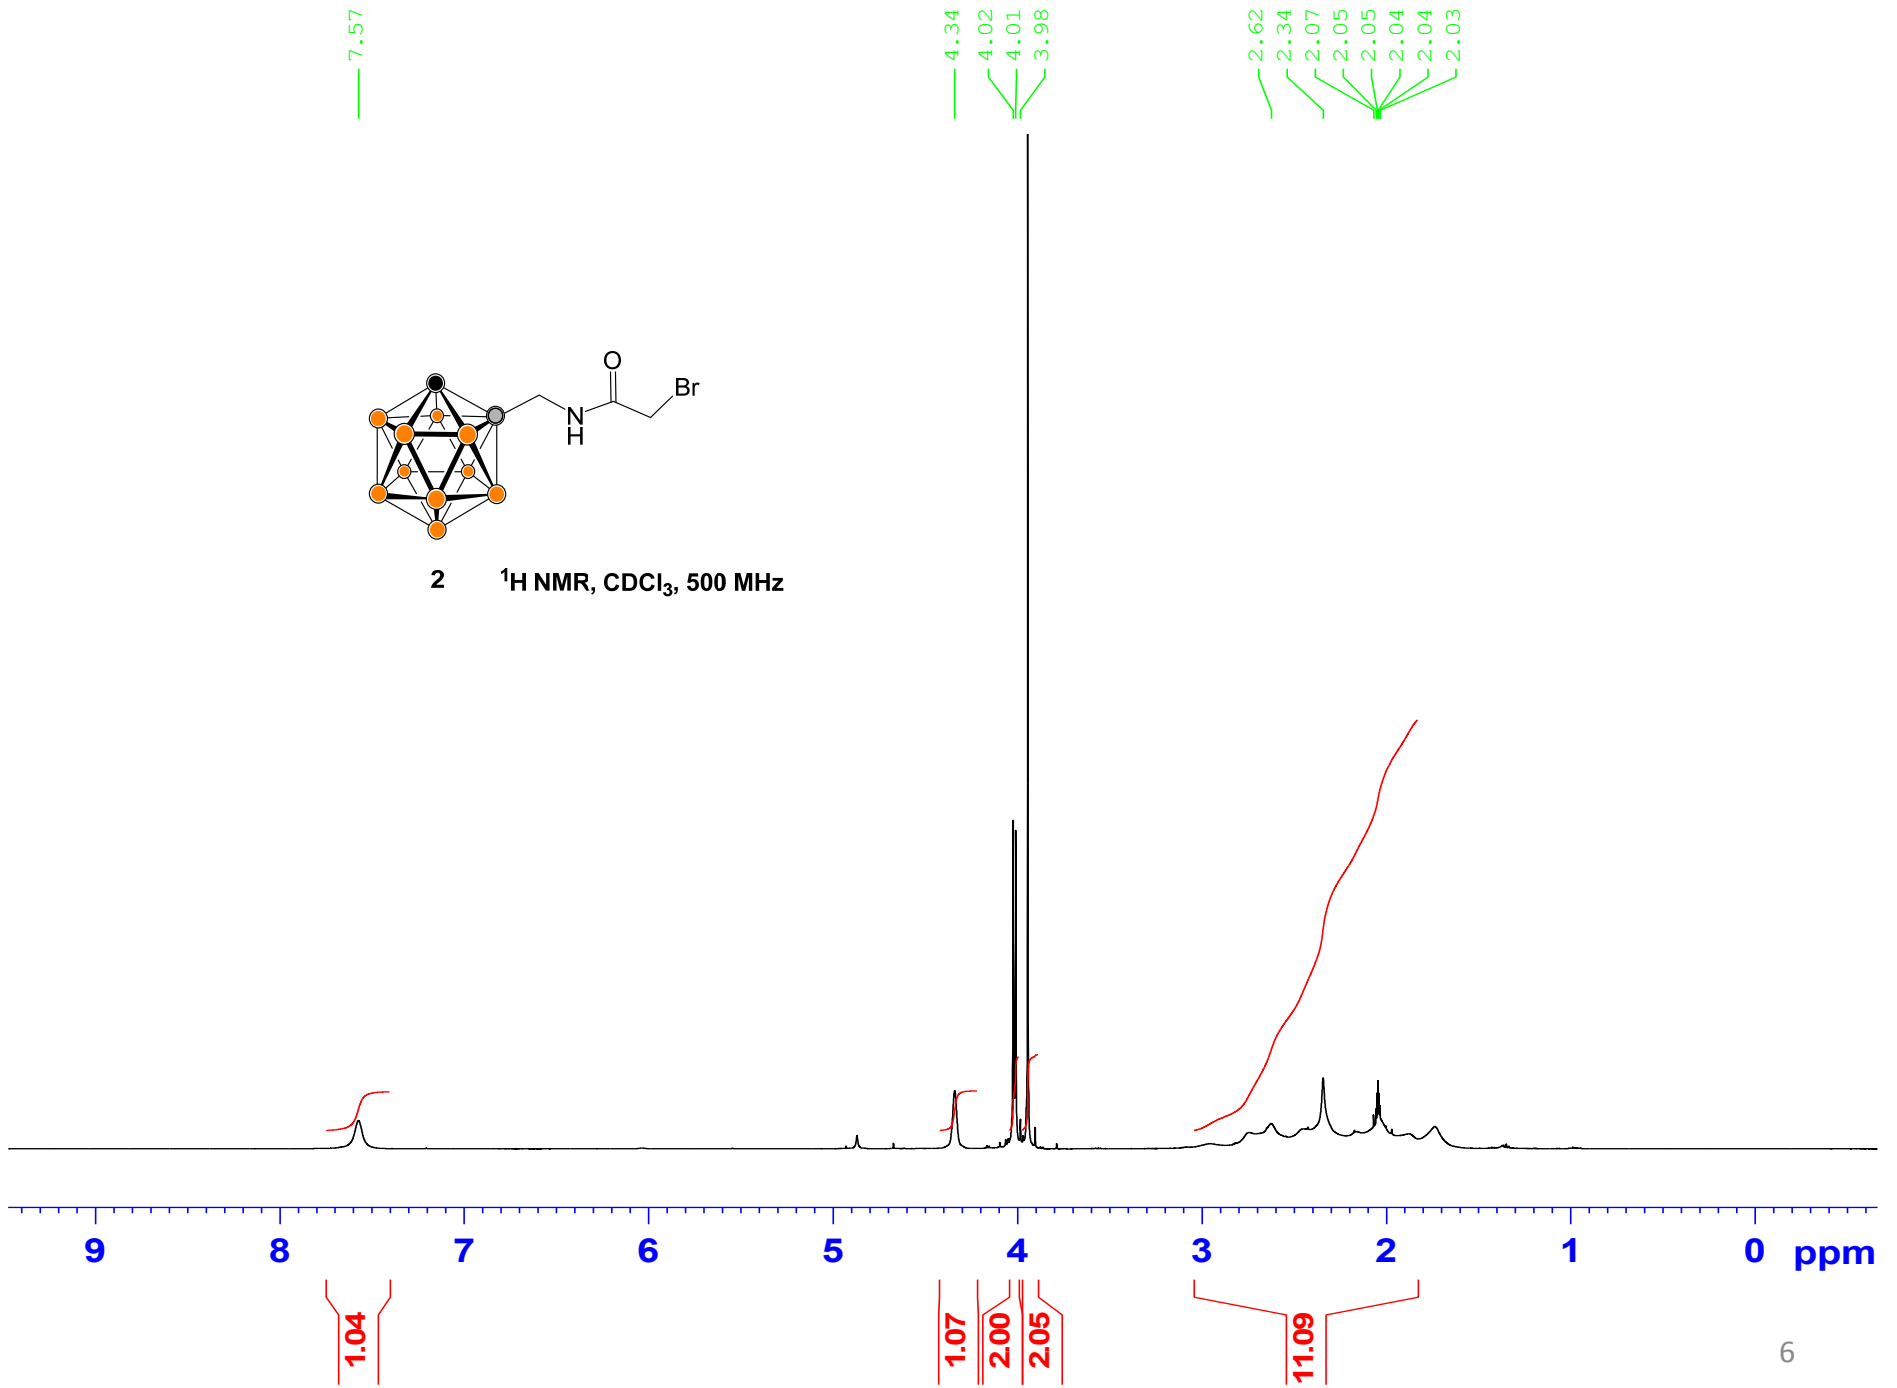

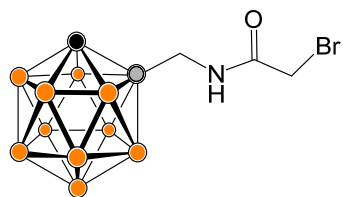

2  $^{13}\text{C}$  NMR,  $\text{CD}_3\text{CN}$ , 125 MHz

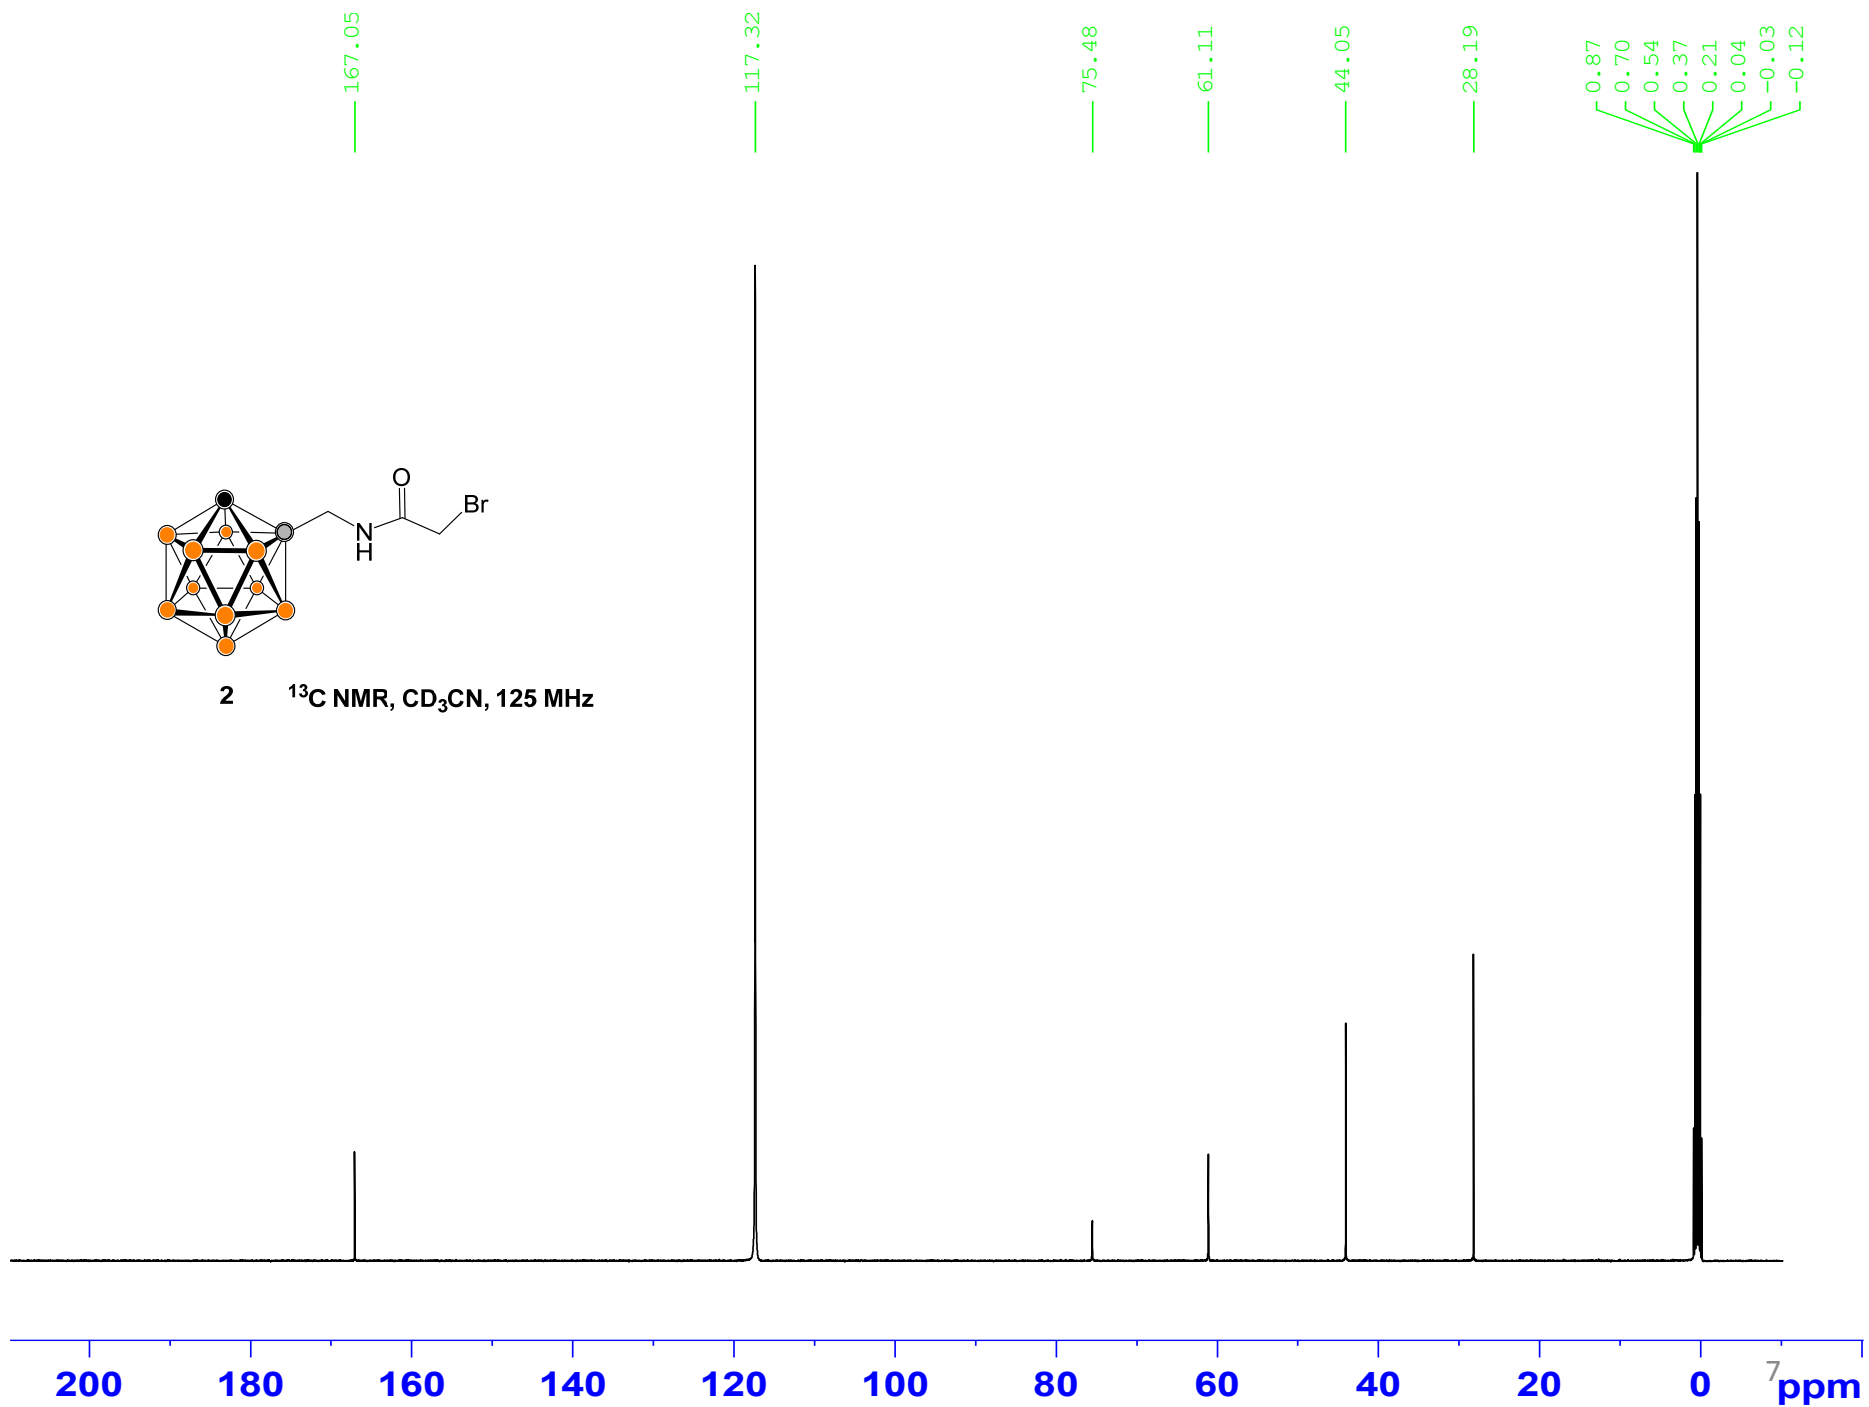

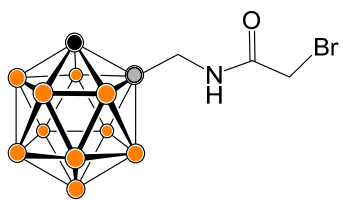

**2**  $^{11}\text{B}$  NMR,  $\text{CD}_3\text{CN}$ , 160 MHz

-1.57  
-4.89  
-9.53  
-11.69  
-12.71

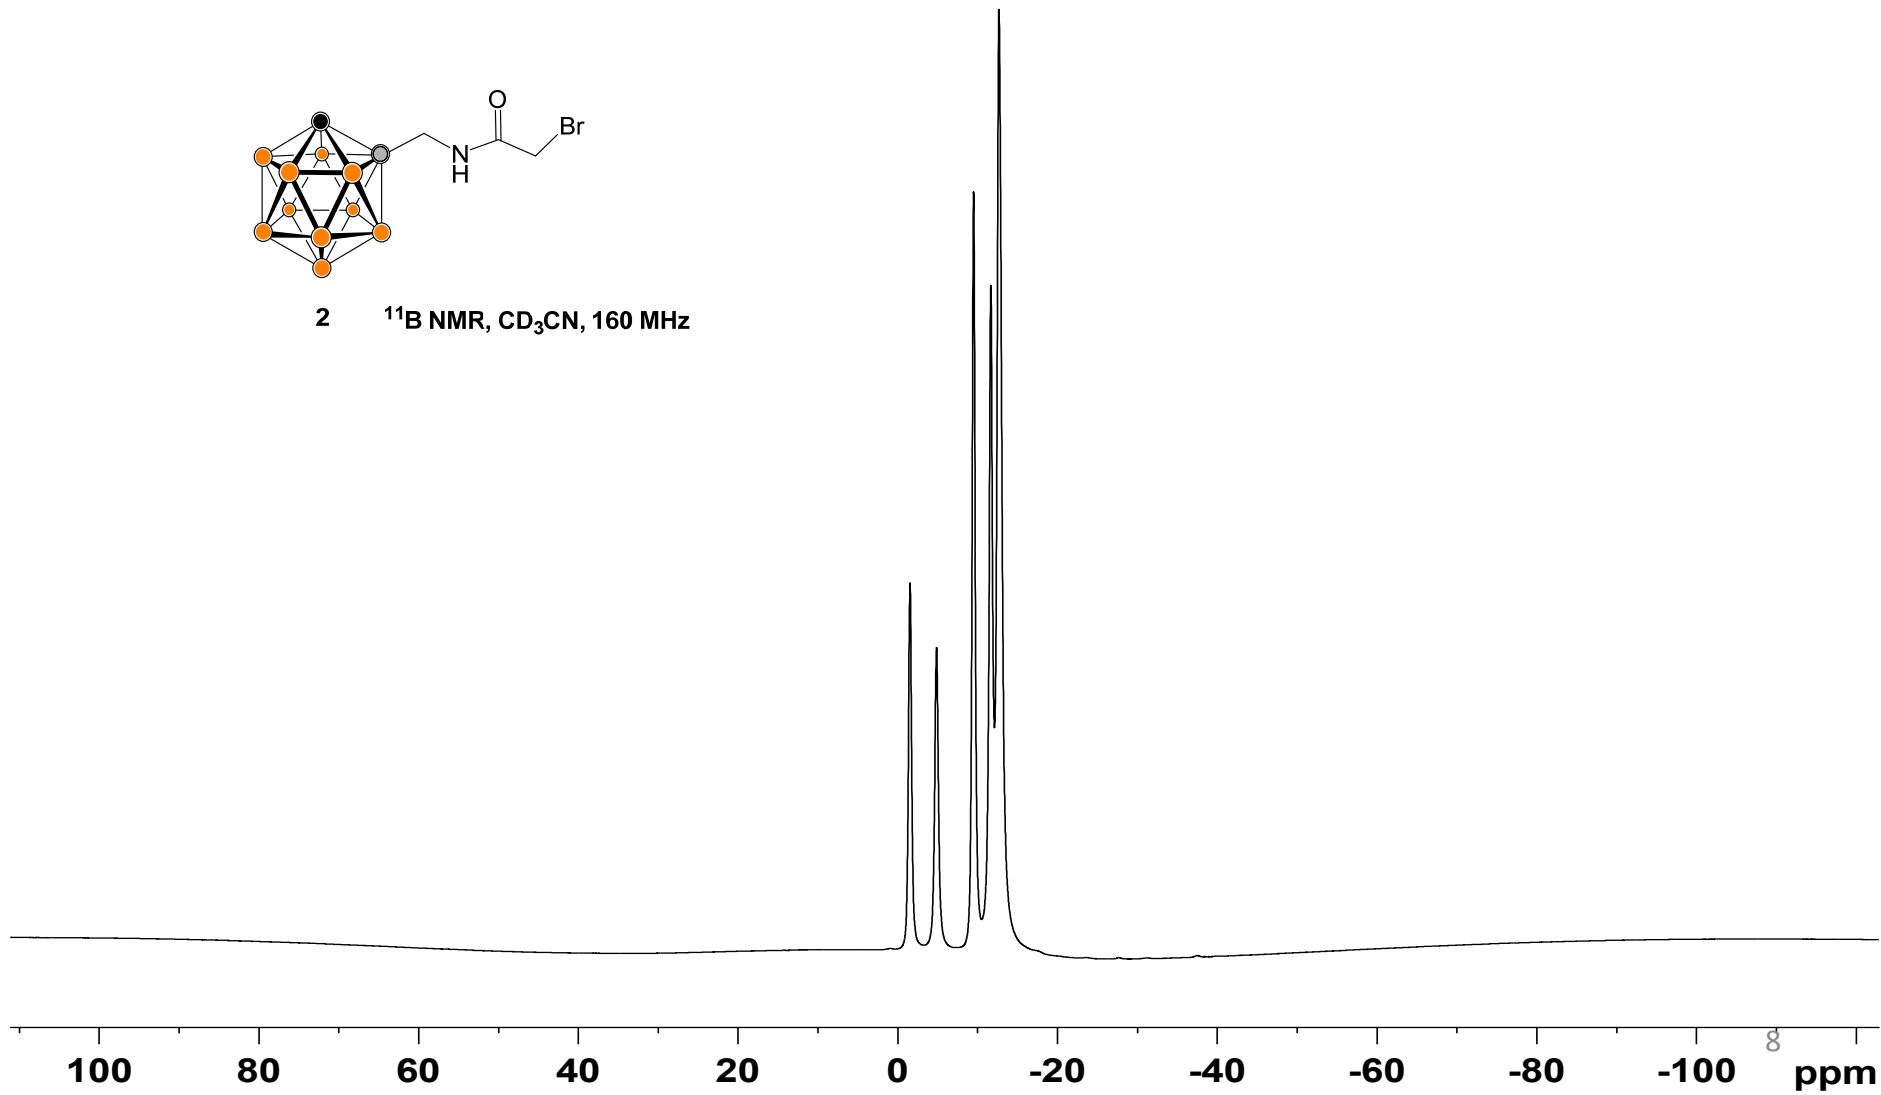



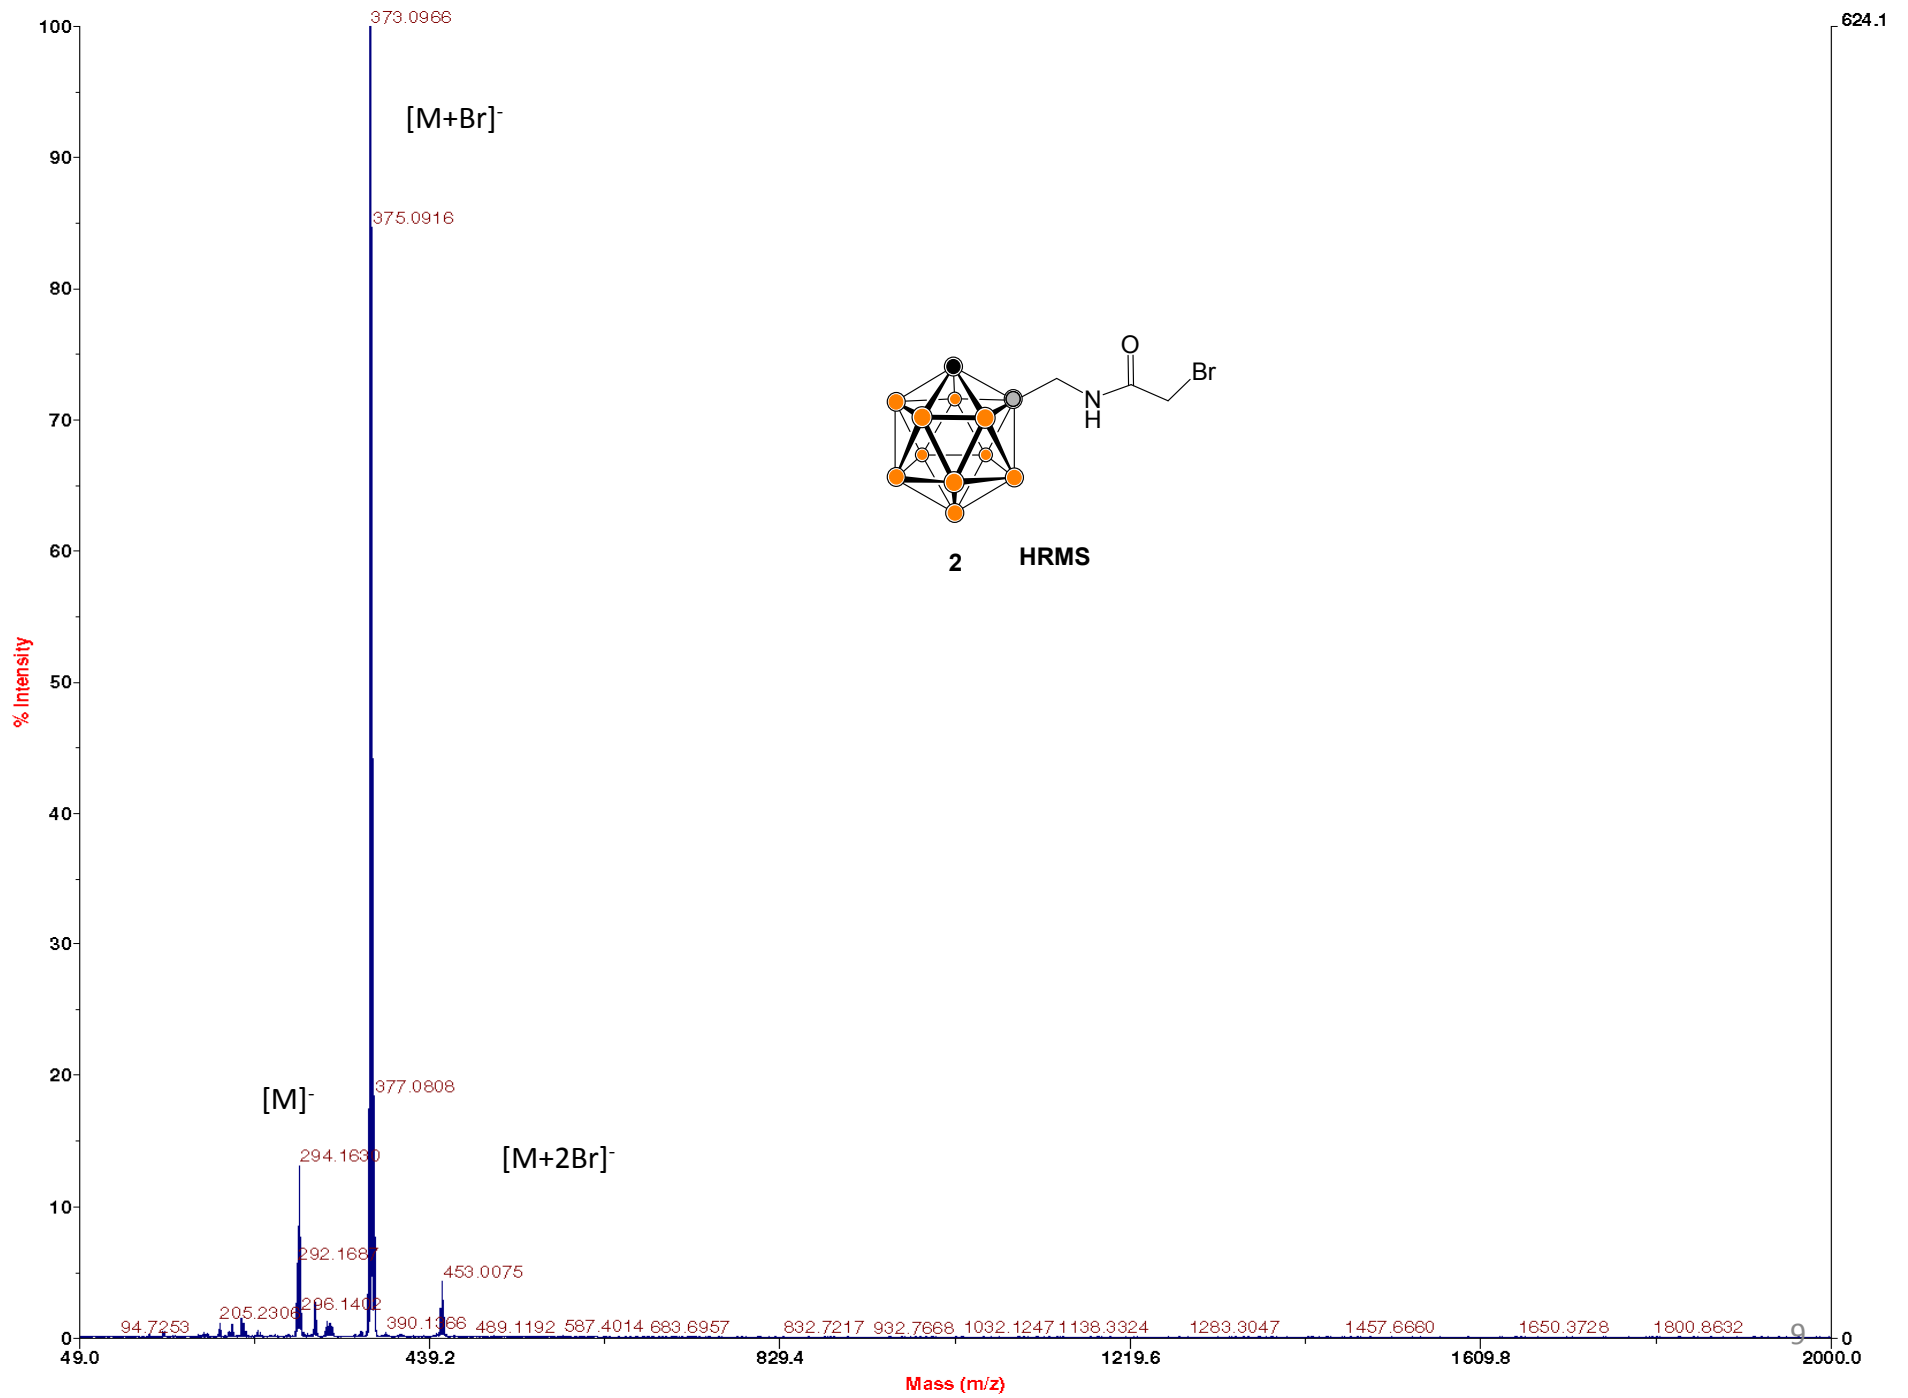

9.319  
9.303  
9.287

4.761

3.952  
3.939

3.292  
3.262

2.913  
2.824

2.174

1.413

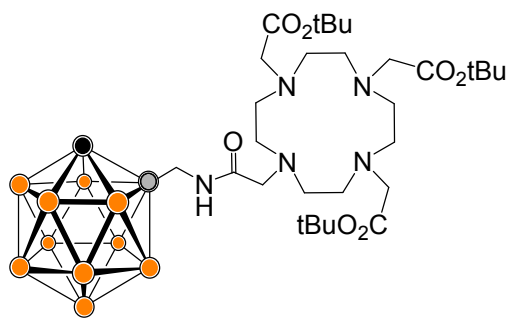

**3** <sup>1</sup>H NMR, CDCl<sub>3</sub>, 400 MHz

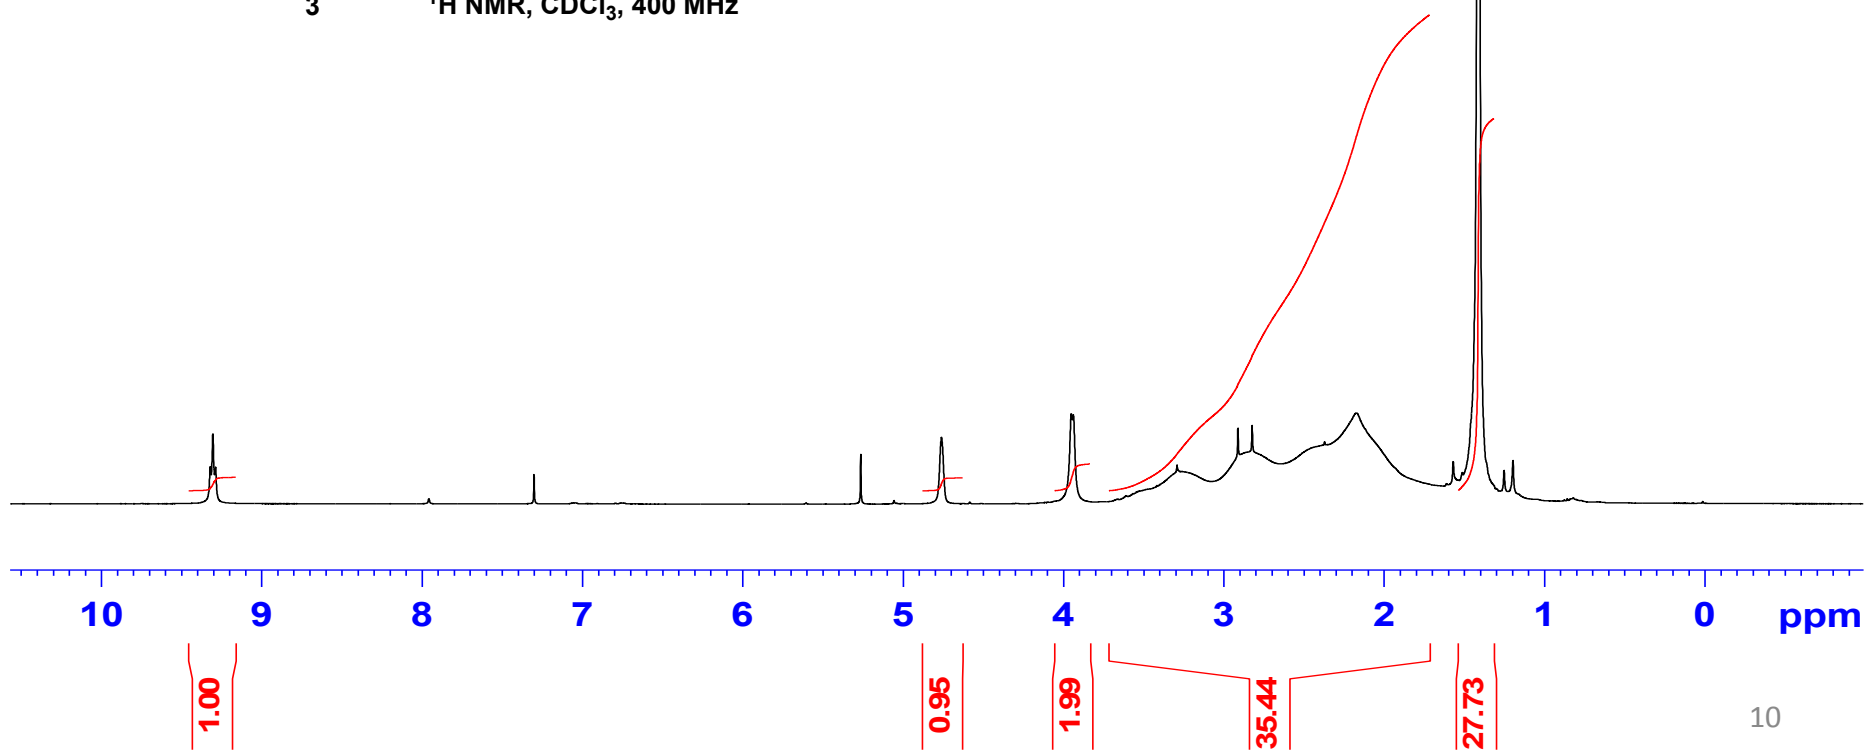

173.303  
172.979  
172.806

82.795  
82.758  
78.319  
78.210  
78.000  
77.682  
76.353  
60.797  
57.042  
56.450  
56.383  
44.159  
30.383  
28.771  
28.663

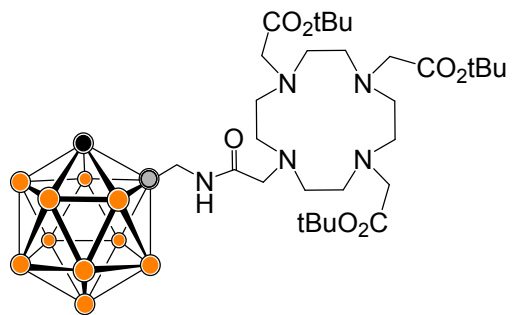

3

<sup>13</sup>CNMR, CDCl<sub>3</sub>, 100.6 MHz

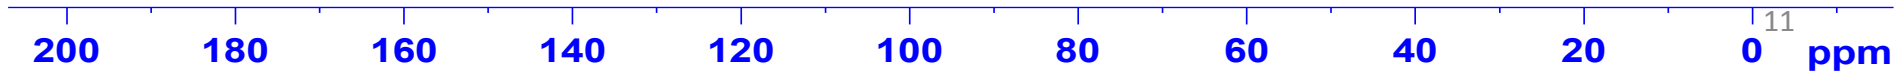

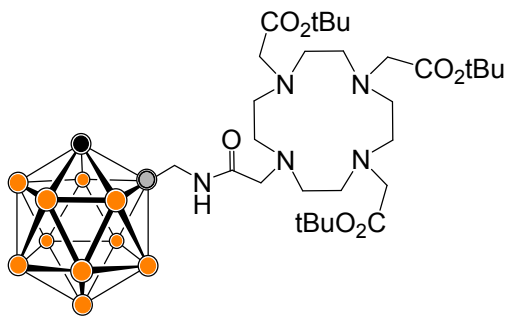

3

<sup>11</sup>B NMR (dc), CDCl<sub>3</sub>, 128 MHz

-1.99  
-5.65  
-10.52

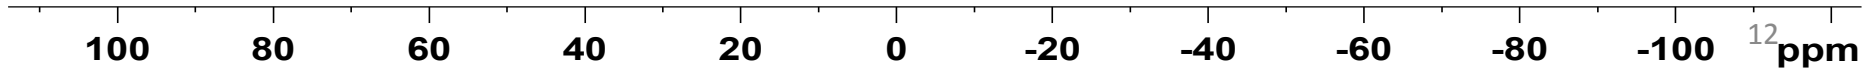

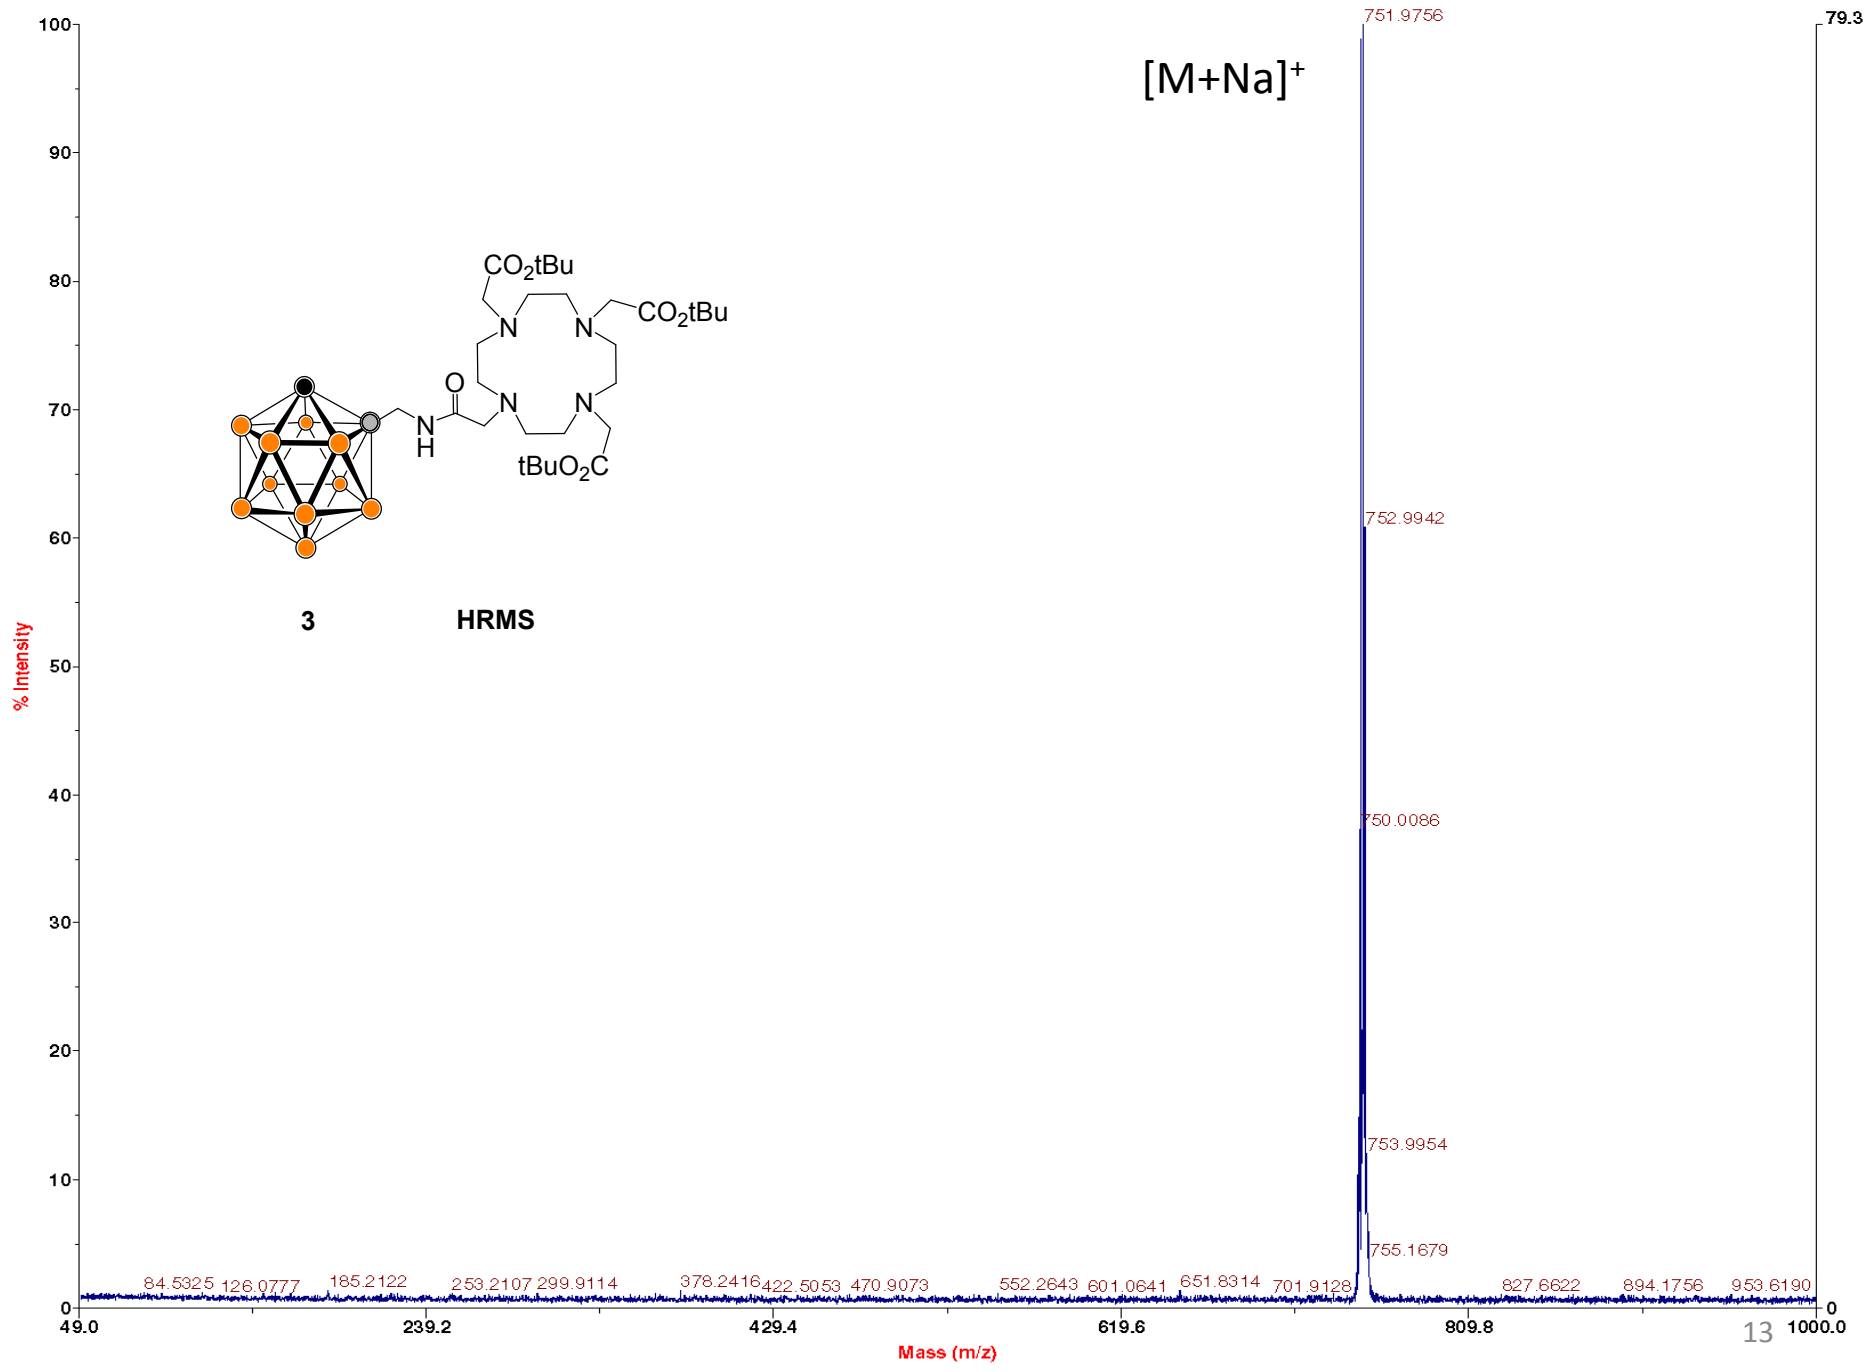

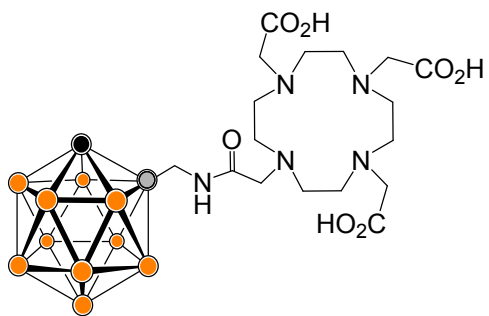

4

$^1\text{H NMR}$ ,  $\text{CD}_3\text{OD}$ , 500 MHz

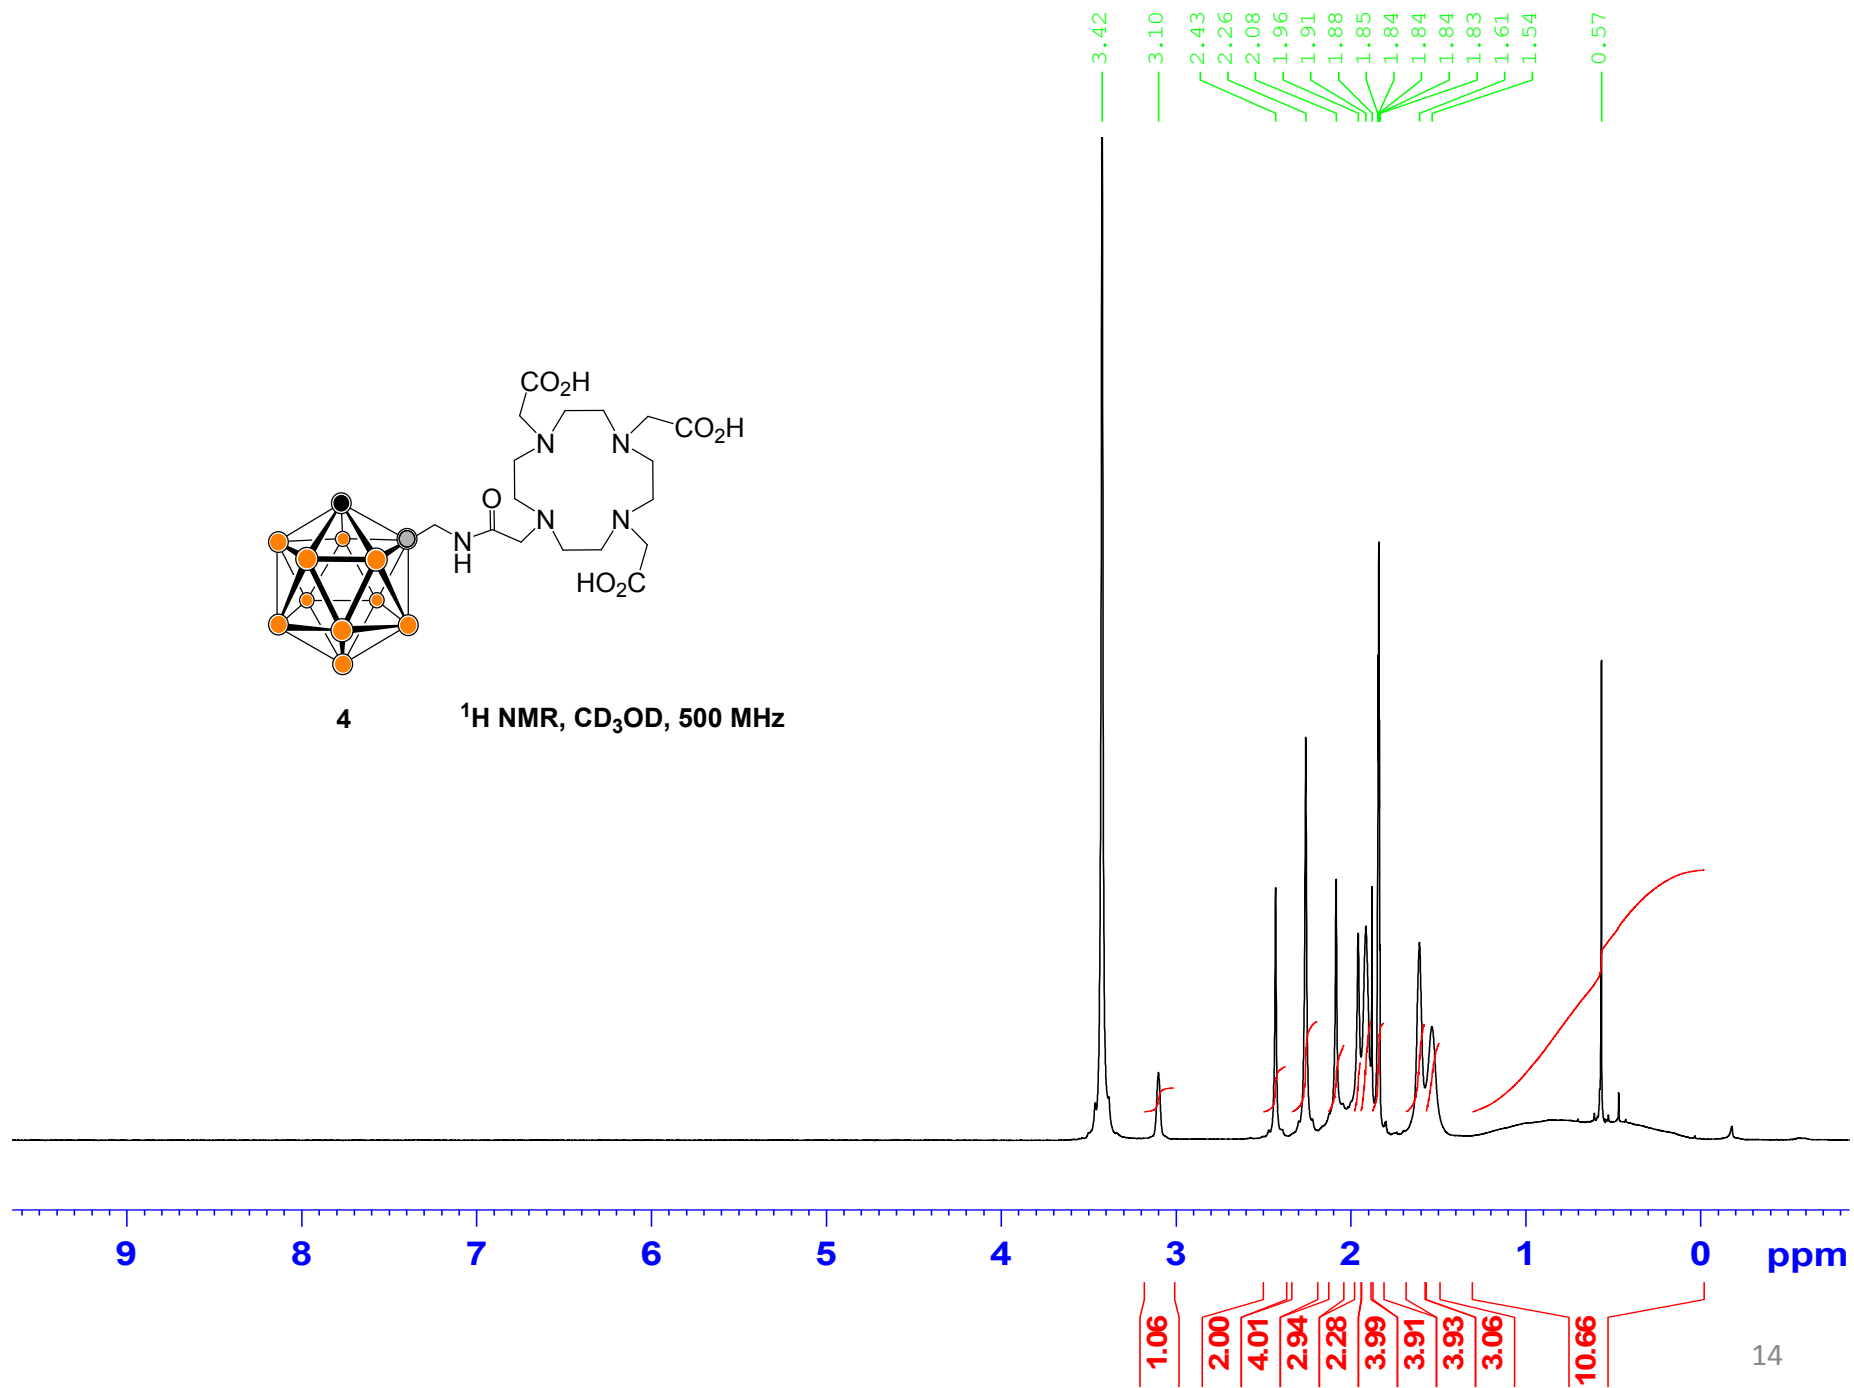

174.79  
172.35  
169.81

118.19

76.99

62.53  
57.83  
55.71  
54.51  
52.62  
51.93  
50.18  
49.76  
45.41

0.81

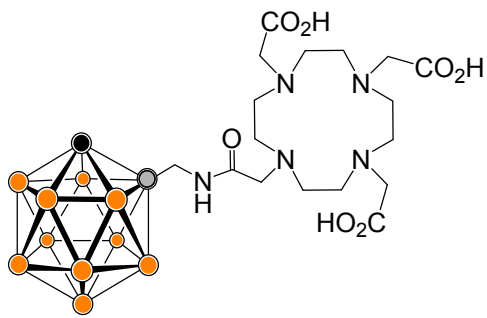

4

<sup>13</sup>C NMR, CD<sub>3</sub>OD, 125 MHz

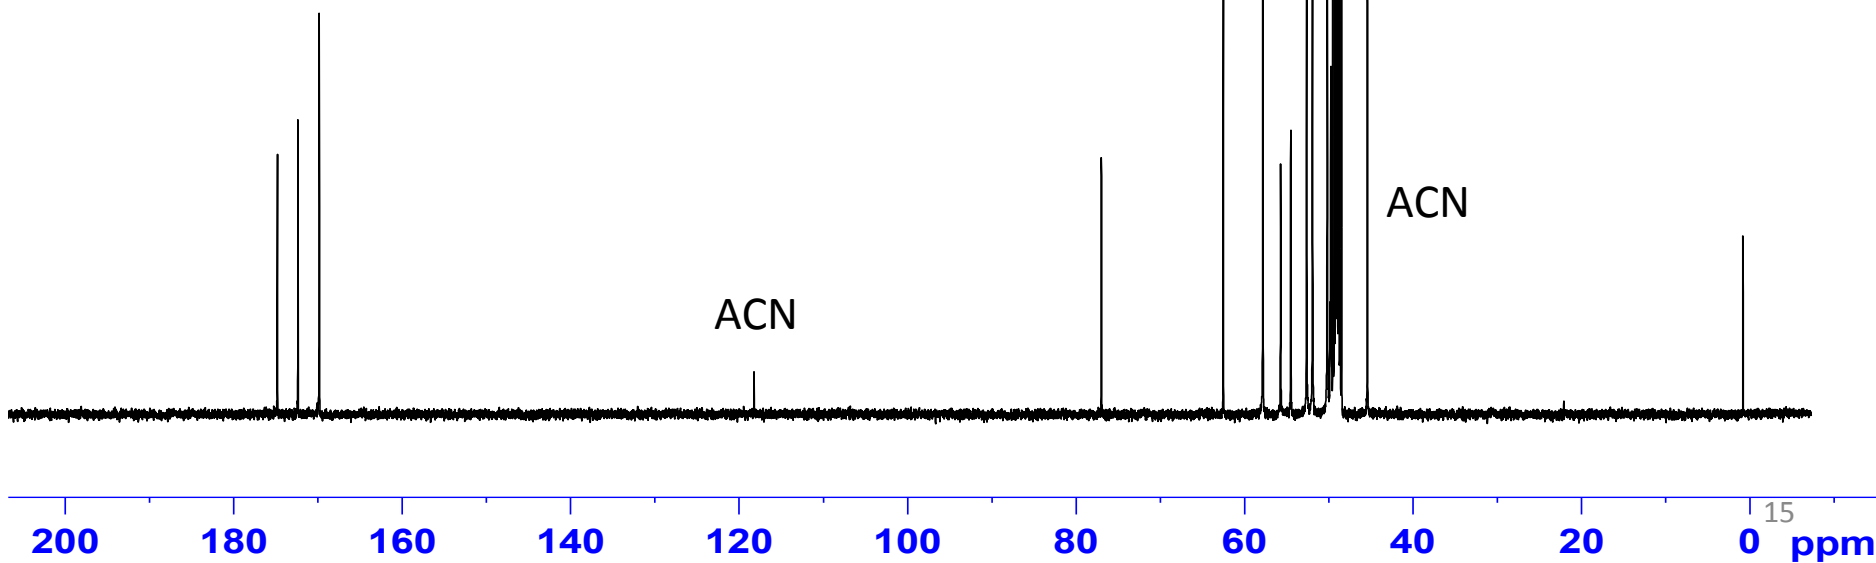

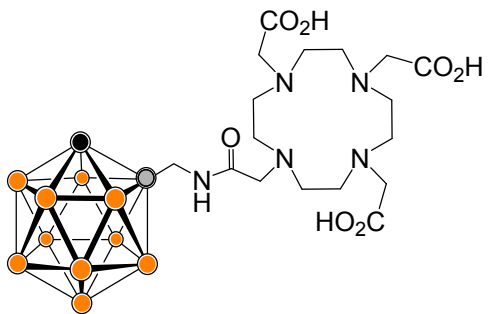

4

$^{11}\text{B}$  NMR,  $\text{CD}_3\text{OD}$ , 160 MHz

-4.14  
-7.17  
-11.45  
-13.14  
-14.17

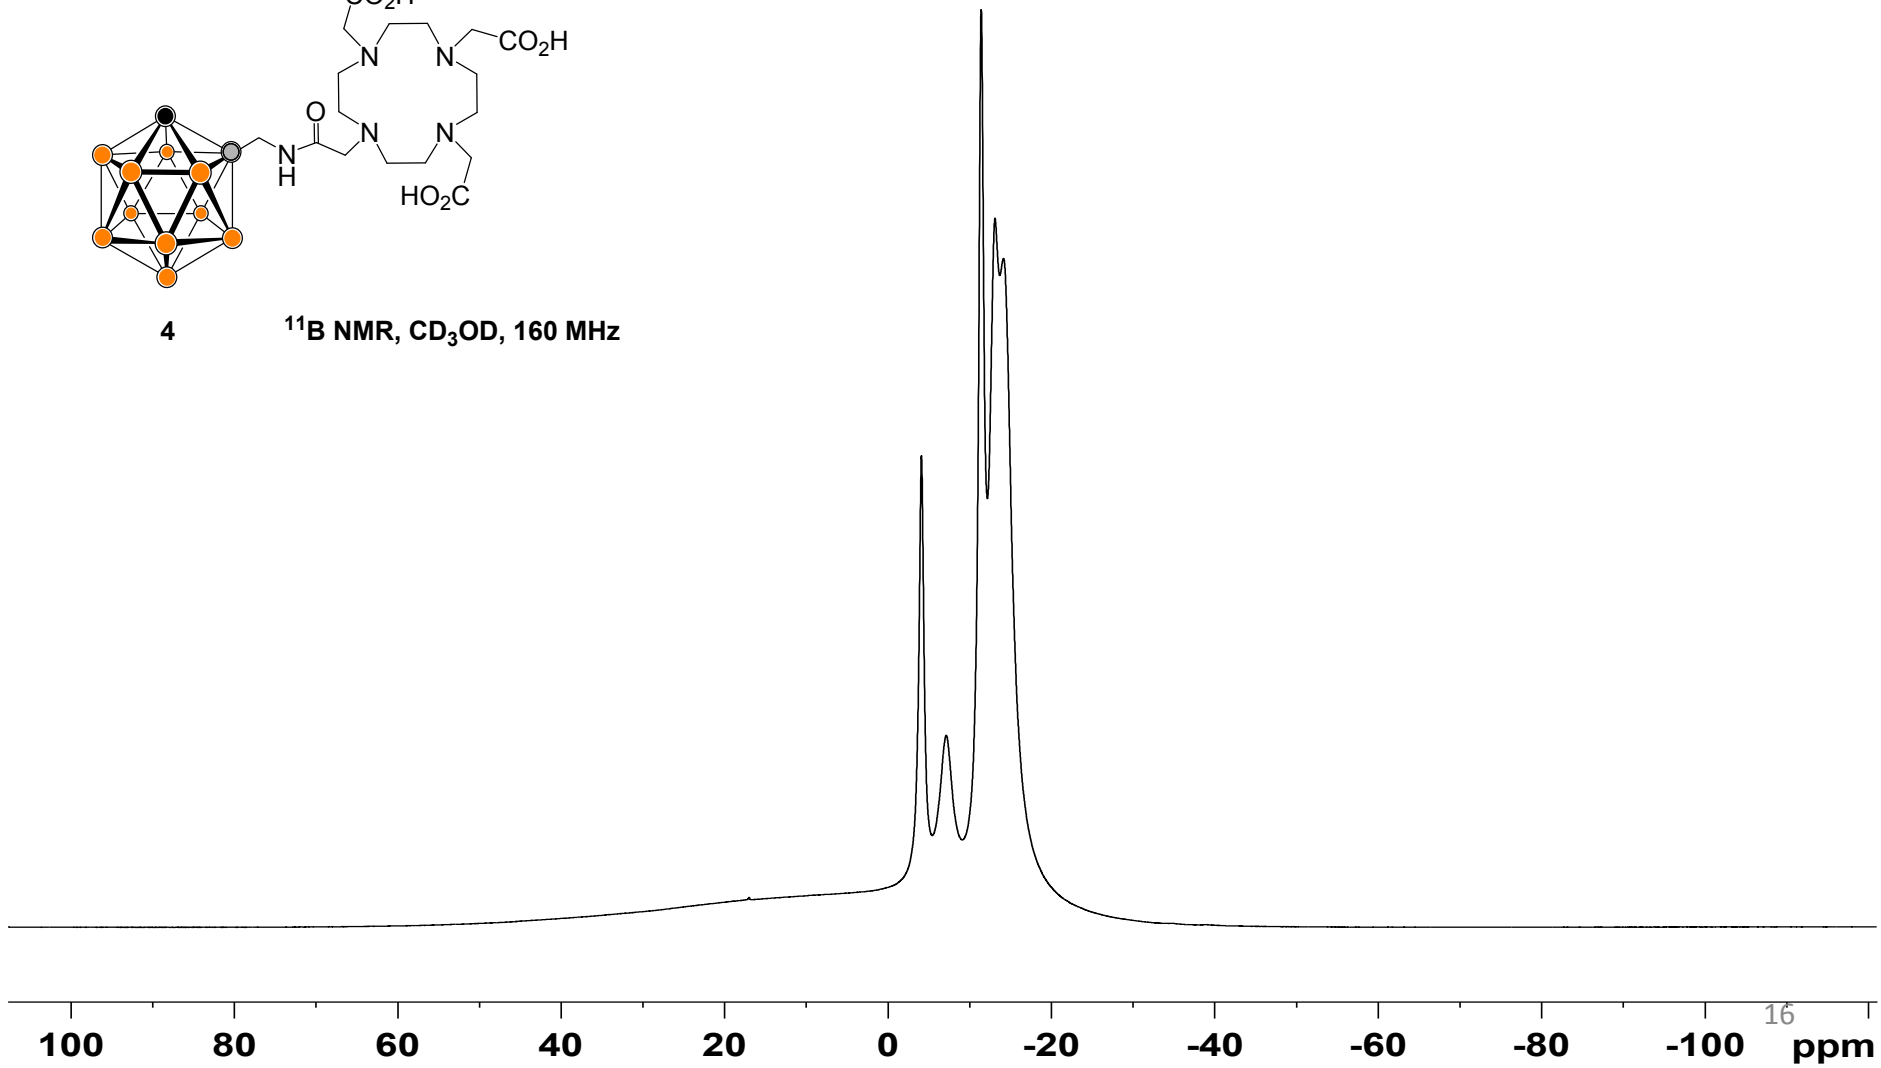



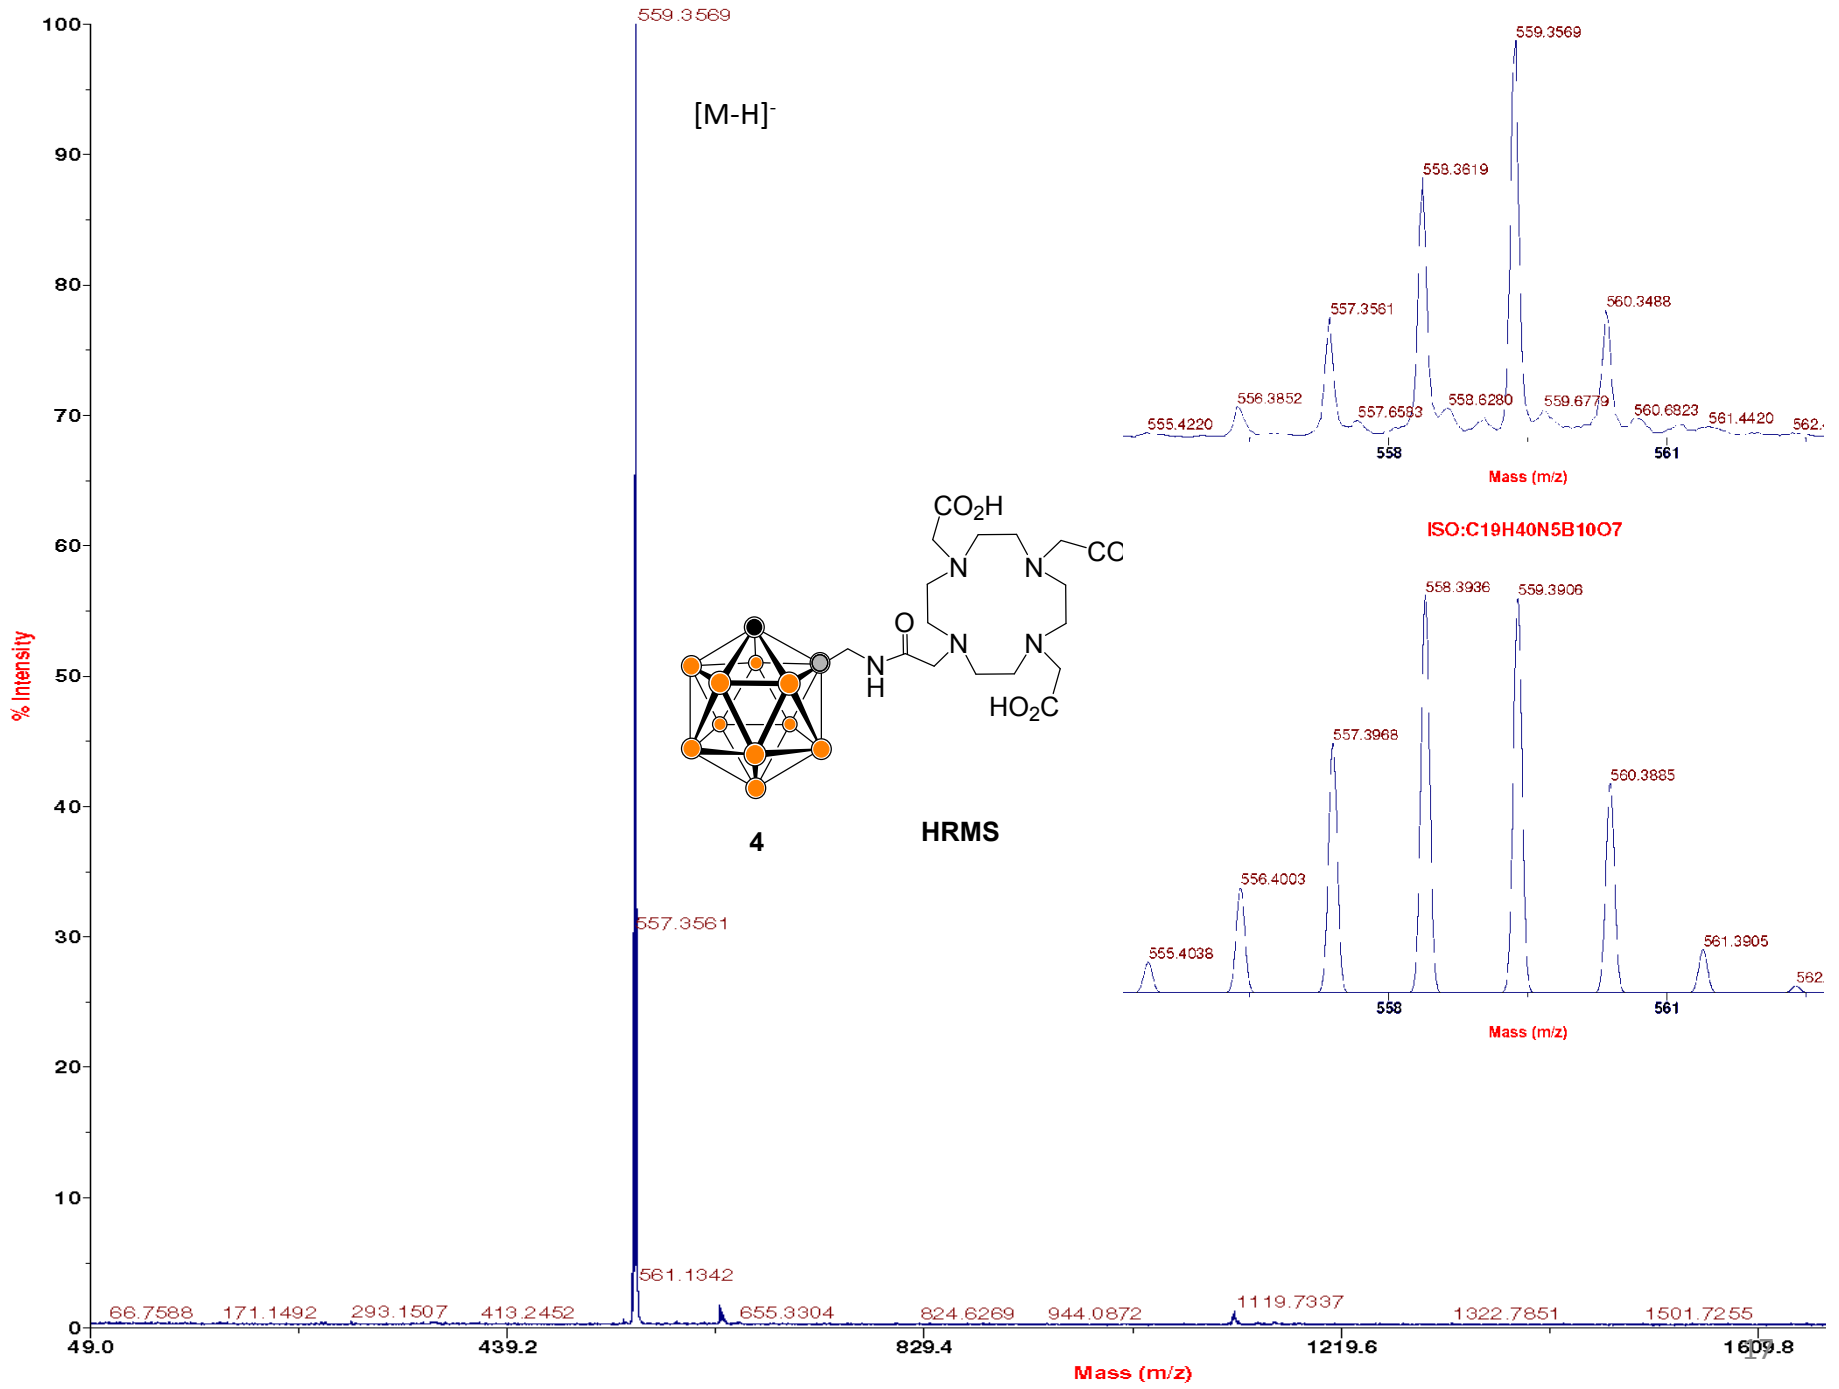

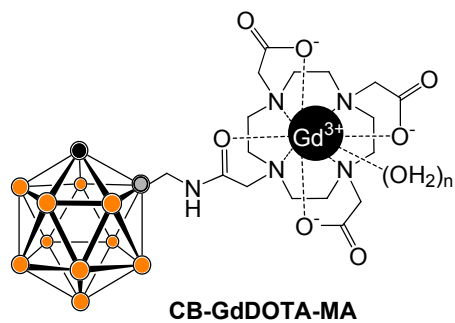

Chemical Formula:  $C_{19}H_{38}B_{10}GdN_5O_7$   
 Molecular Weight: 713.8943

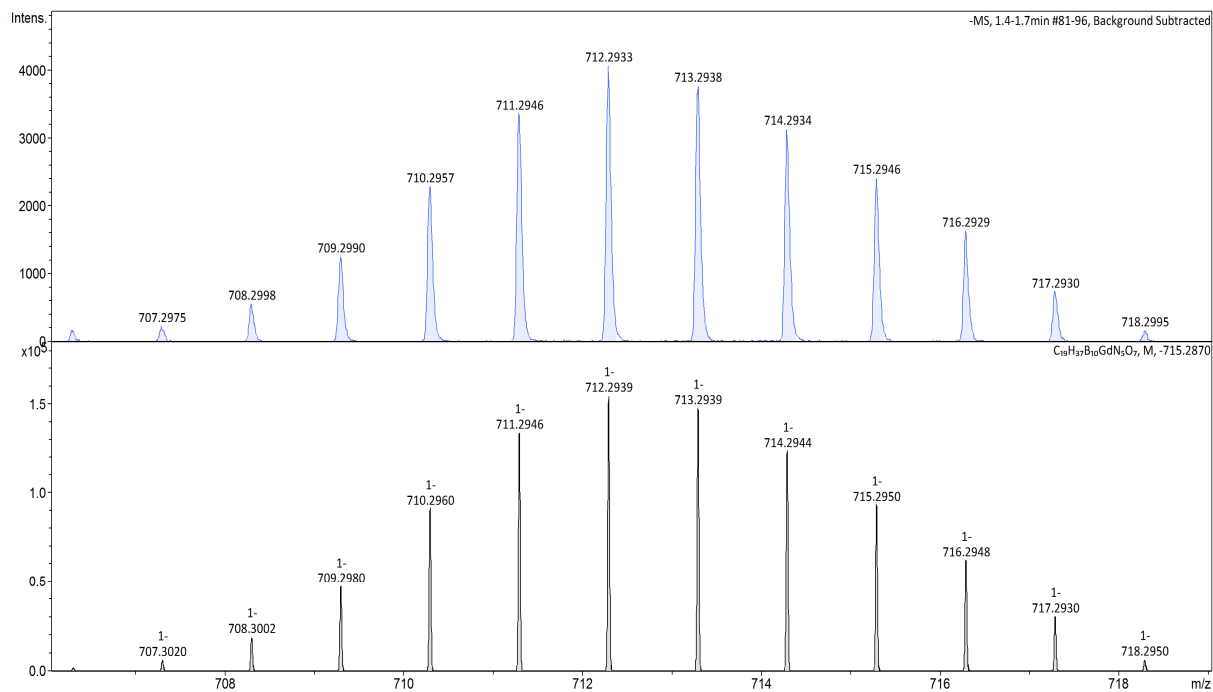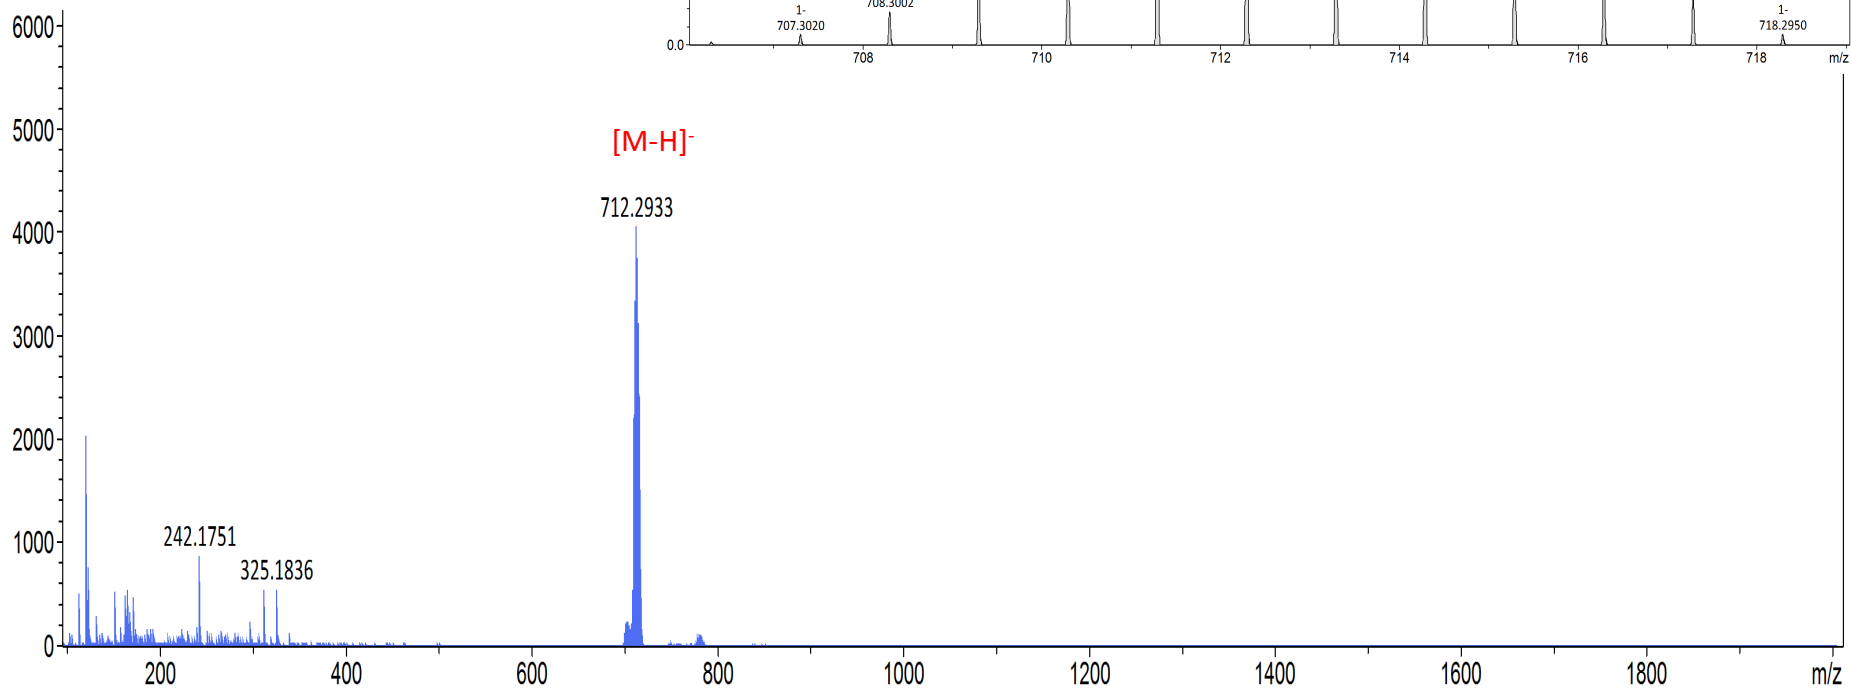

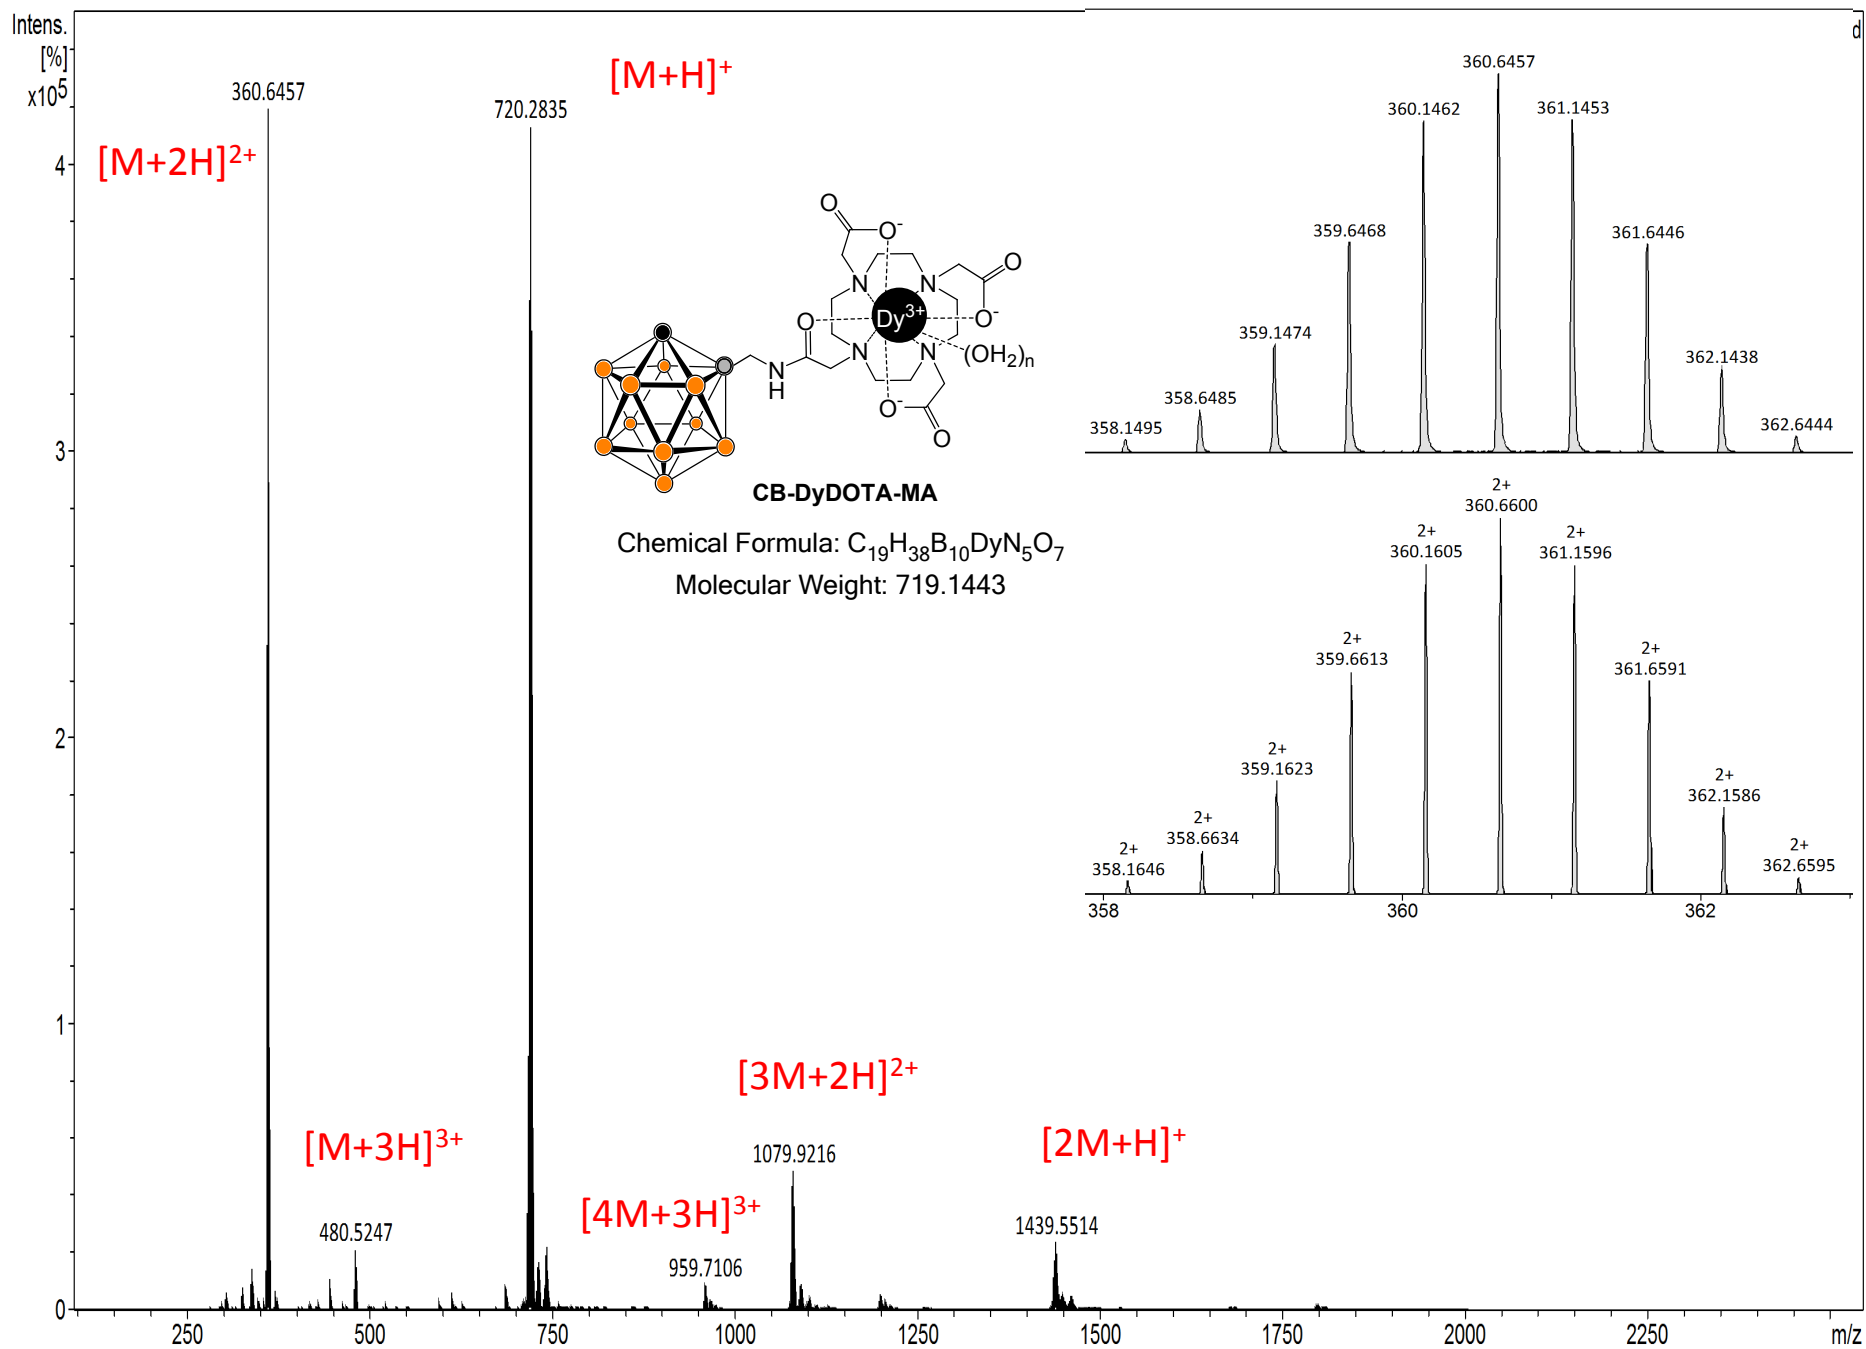

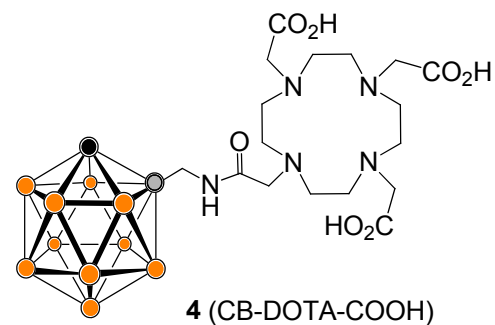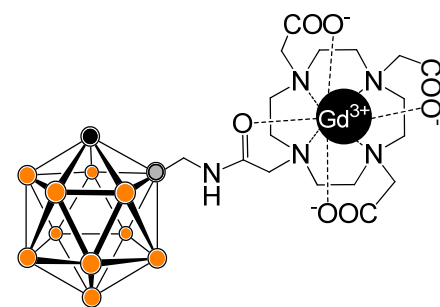

CB-GdDOTA-MA

#### Analytical HPLC analysis of CB-GdDOTA-MA

Instrument: Alliance Waters 2695.

Column: Agilent Zorbax SB-C18, 5  $\mu$ m (4.6 x 250 mm).

Eluent: 1 mL/min; gradient: B 0% to 100% over 45 min,  
B 100% 45-60 min (A: water, B: acetonitrile).

Detector: Evaporative Scattering Detector (SEDEX 75,  
operated at 45 °C and 3.5 bars using N<sub>2</sub>).

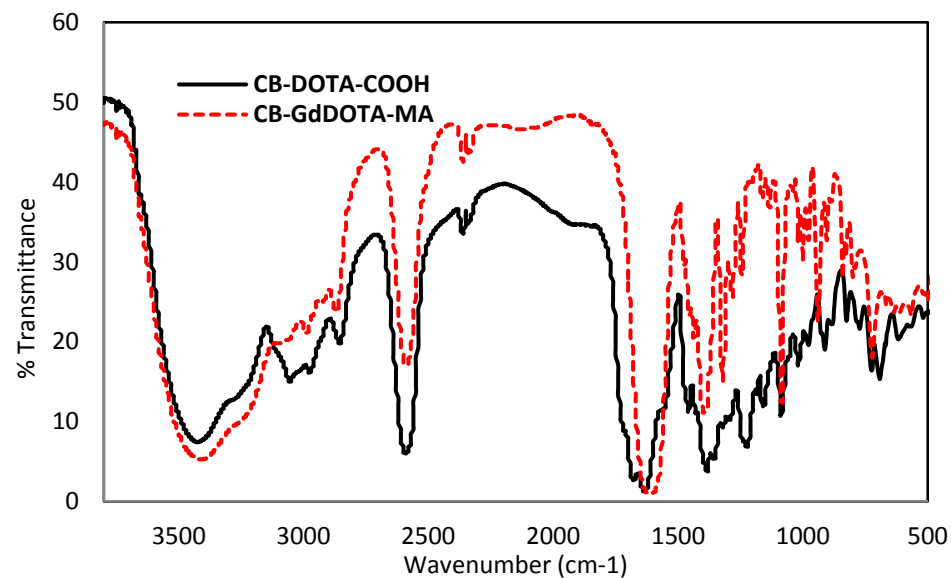

Fig. S1 IR spectrums of compound 4 and CB-GdDOTA-MA.

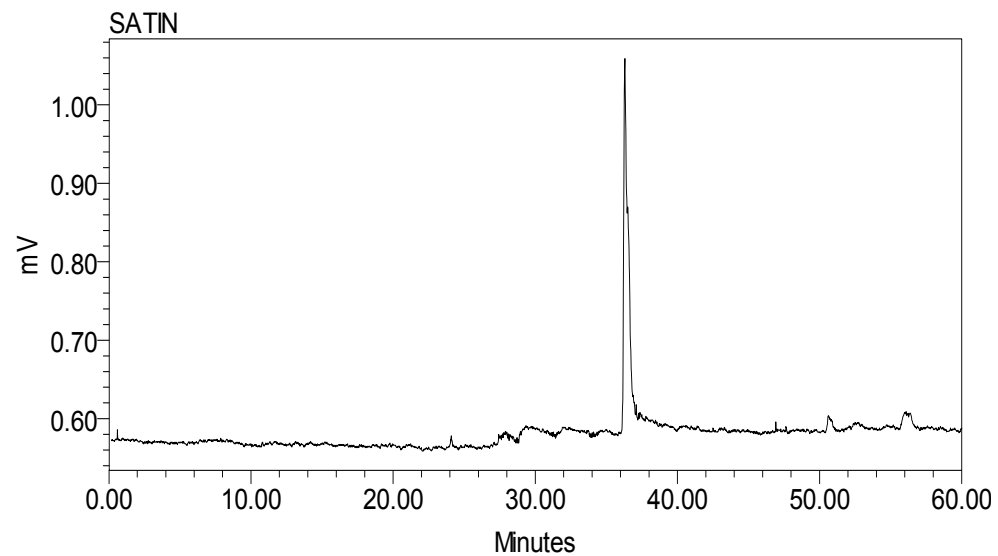

Fig. S2 HPLC trace of CB-GdDOTA-MA.

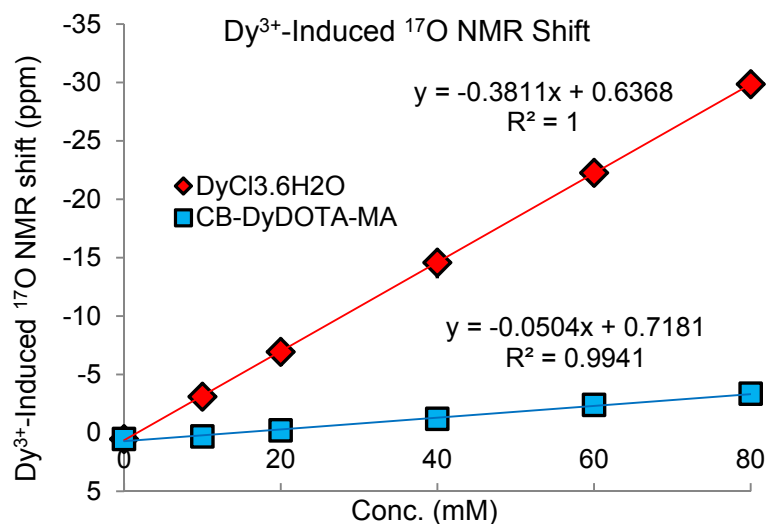

**Fig. S3** Determination of Hydration number ( $q$ ) for **CB-DyDOTA-MA**.

**Determination of hydration number ( $q$ ) for CB-DyDOTA-MA:** Varying concentrations of **CB-DyDOTA-MA** and  $\text{DyCl}_3 \cdot 6\text{H}_2\text{O}$  over the range 10-80  $\text{mmol dm}^{-3}$  were prepared in 80%  $\text{D}_2\text{O}$ - $\text{H}_2\text{O}$  and the pH of the solutions was adjusted to pH 7.0. The  $^{17}\text{O}$  NMR experiments were performed using a Bruker Ascend 400 MHz NMR instrument at RT with the deuterium signal locked. A graph was plotted between the  $\Delta\delta$  and the concentration for both **CB-DyDOTA-MA** and the  $\text{DyCl}_3 \cdot 6\text{H}_2\text{O}$  solutions and slope was obtained. The  $\Delta\delta$  value for a complex with the general formula,  $\text{Dy}(\text{ligand})_n(\text{H}_2\text{O})_q$ , is given by the following relation;

$$(\Delta\delta) = q\Delta[\text{Dy}(\text{ligand})_n(\text{H}_2\text{O})_q]/[\text{H}_2\text{O}] \quad (\text{I})$$

The slope of a plot of the  $\Delta\delta$  versus the  $\text{Dy}^{3+}$  concentration is proportional to the  $q$  value of the complex (Figure). The  $q$  value was obtained by linearly fitting the  $\Delta\delta$  value and was found to be 2 for complex **CB-DyDOTA-MA**.

From the graph, which fit well to a straight line, the slope was calculated. From relation I, the slope of the graph can be equated with the following;  
Slope =  $q\Delta/[\text{H}_2\text{O}]$ ,

From the graph, the slope was calculated as,

$$\begin{aligned} \text{Slope} &= -381 \text{ ppm dm}^3 \text{ mol}^{-1} \text{ or,} \\ q\Delta/[\text{H}_2\text{O}] &= -381 \text{ ppm dm}^3 \text{ mol}^{-1} \end{aligned}$$

For  $\text{DyCl}_3$ , the value of  $q$  was assumed to be 9, because the coordination number of Dy(III) in such complexes known to be 9. Hence, the value of  $\Delta/[\text{H}_2\text{O}]$  is calculated as follows:

$$\begin{aligned} \Delta/[\text{H}_2\text{O}] &= -381 \text{ ppm dm}^3 \text{ mol}^{-1} / 9 \text{ or} \\ \Delta/[\text{H}_2\text{O}] &= -42.3 \text{ ppm dm}^3 \text{ mol}^{-1} \end{aligned}$$

From this calculation, a value of  $q$  for the DOTA- $\text{Dy}^{3+}$  complex **CB-DyDOTA-MA** is calculated as follows:

For complex **CB-DyDOTA-MA**, Slope =  $q\Delta/[\text{H}_2\text{O}]$ , or

$$q = \text{slope}/(\Delta/[\text{H}_2\text{O}]) \text{ or } q = -50.4/-42.3, \text{ hence}$$

$$q = 1.2$$

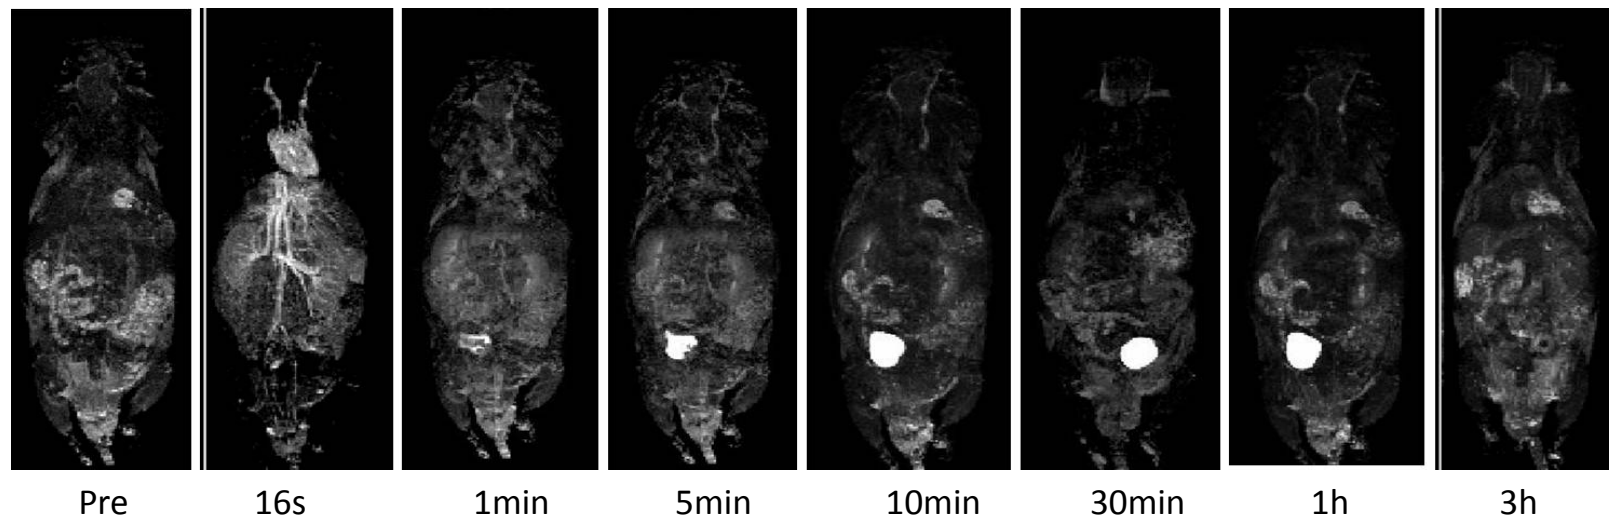

**Fig. S4** Representative *in vivo* T1-weighted MRA scans of a mouse at various time points p.i. of Omniscan at a Gd dose of 1.2 mmol/kg.
